1 **The *Mycobacterium tuberculosis* Pup-proteasome system regulates nitrate**  
2 **metabolism through an essential protein quality control system**

3

4 Samuel H. Becker<sup>1</sup>, Jordan B. Jastrab<sup>1,2</sup>, Avantika Dhabaria<sup>3</sup>, Catherine T. Chaton<sup>4</sup>,  
5 Jeffrey S. Rush<sup>4</sup>, Konstantin V. Korotkov<sup>4</sup>, Beatrix Ueberheide<sup>3</sup>, and K. Heran Darwin<sup>1\*</sup>

6

7 <sup>1</sup>Department of Microbiology, New York University School of Medicine, 430 E. 29th Street,  
8 Suite 312, New York, NY 10016, USA

9 <sup>2</sup>Current address: Department of Medicine, Brigham and Women's Hospital, Boston, MA  
10 02115, USA

11 <sup>3</sup>Proteomics Laboratory, Division of Advanced Research Technologies, New York  
12 University School of Medicine, 430 E. 29<sup>th</sup> Street, Suite 860, New York, NY 10016

13 <sup>4</sup>Department of Molecular and Cellular Biochemistry, University of Kentucky,  
14 741 S. Limestone Street, Lexington, KY 40536, USA

15

16 \*Corresponding author: heran.darwin@med.nyu.edu

17 **Classification:** Biological Sciences: Microbiology

18 **Keywords:** *Mycobacterium tuberculosis*, proteasome, nitrate, chaperonins

19 **ABSTRACT**

20 The human pathogen *Mycobacterium tuberculosis* (*M. tuberculosis*) encodes a  
21 proteasome that carries out regulated degradation of bacterial proteins. It has been  
22 proposed that the proteasome contributes to nitrogen metabolism in *M. tuberculosis*,  
23 although this hypothesis had not been tested. Upon assessing *M. tuberculosis* growth in  
24 several nitrogen sources, we found that a mutant strain lacking the *Mycobacterium*  
25 proteasomal activator Mpa was unable to use nitrate as a sole nitrogen source due to a  
26 specific failure in the pathway of nitrate reduction to ammonium. We found that the robust  
27 activity by the nitrite reductase complex NirBD depended on expression of the  
28 *groEL/groES* chaperonin genes, which are regulated by the repressor HrcA. We identified  
29 HrcA as a likely proteasome substrate, and propose that the degradation of HrcA is  
30 required for the full expression of chaperonin genes. Furthermore, our data suggest that  
31 degradation of HrcA, along with numerous other proteasome substrates, is enhanced  
32 during growth in nitrate to facilitate the de-repression of the chaperonin genes.  
33 Importantly, growth in nitrate is the first example of a specific condition that reduces the  
34 steady-state levels of numerous proteasome substrates in *M. tuberculosis*.

35 **SIGNIFICANCE STATEMENT**

36 The proteasome is required for the full virulence of *M. tuberculosis*. However, the extent  
37 of its role as a regulator of bacterial physiology remains unclear. In this work, we  
38 demonstrate a novel function of the proteasome system in maintaining the expression of  
39 essential chaperonin genes. This activity by the proteasome is required for *M.*  
40 *tuberculosis* to use nitrate as a nitrogen source. Furthermore, we identified a specific  
41 growth condition that robustly decreases the abundance of pupylated proteins. This  
42 observation strongly suggests the presence of a yet-to-be-determined mechanism of  
43 control over the Pup-proteasome system in *M. tuberculosis* that is induced in nitrate.

44

## 45 INTRODUCTION

46 *Mycobacterium tuberculosis* (*M. tuberculosis*), the causative agent of the human disease  
47 tuberculosis, encodes a proteasome that is essential for its lethality in mice (1, 2). The  
48 central component of all proteasomes is a 28-subunit complex of four stacked rings  
49 known as the 20S core particle (20S CP). In *M. tuberculosis*, two identical outer rings,  
50 each composed of seven  $\alpha$ -subunits (PrcA) serve as a gated entryway for protein  
51 substrates, and two identical inner rings, composed of a total of 14  $\beta$ -subunits (PrcB),  
52 form the catalytic active sites of the protease (1, 3-5). While essential in eukaryotes and  
53 archaea, proteasomes are found only in a subset of bacteria primarily belonging to the  
54 *Actinomycetales* and *Nitrospirales* orders, and are not always essential for bacterial  
55 viability (6, 7).

56 In eukaryotes and bacteria, proteasomes carry out the regulated proteolysis of  
57 specific cellular substrates. Interest in the *M. tuberculosis* proteasome emerged after a  
58 screen for mutations that rendered this bacterial species sensitive to nitric oxide (NO), a  
59 host-derived molecule that is critical for controlling *M. tuberculosis* growth in mice (8),  
60 identified mutations in genes linked to *prcBA*. Over the years, it was determined that some  
61 proteasome substrates in *M. tuberculosis* are covalently modified with a small protein  
62 called Pup (prokaryotic ubiquitin-like protein) by a dedicated ligase, PafA (proteasome  
63 accessory factor A) (9-11). These pupylated proteins are recognized by a proteasomal  
64 activator, Mpa (mycobacterial proteasome ATPase, also known as ARC), which uses  
65 ATP hydrolysis to power the unfolding and delivery of proteins into 20S CPs for  
66 degradation (1, 12). Pup can also be removed from substrates by an enzyme called Dop  
67 (deamidase of Pup) (13, 14), as well as by PafA (15). Collectively, Dop, PafA, Pup, Mpa

68 and 20S CPs constitute the core "Pup-proteasome system" (PPS). At least sixty *M.*  
69 *tuberculosis* proteins are currently known to be pupylation substrates (9, 16, 17), while  
70 studies performed in other Pup-bearing bacteria, including *Mycobacterium smegmatis* (*M.*  
71 *smegmatis*), have identified hundreds of additional potential targets of pupylation (18-21).  
72 Of note, many pupylated proteins in *M. tuberculosis* are not degraded under routine  
73 culture conditions for reasons that remain unknown (16). This observation suggests  
74 pupylation may not immediately send proteins to the proteasome and could possibly  
75 serve a non-degradative regulatory role, as is observed in *Corynebacteria* (22).

76 In addition to being highly sensitive to NO *in vitro*, PPS mutants are highly  
77 attenuated for virulence in mouse infection models (2, 12, 23). The failure to degrade a  
78 single pupylated substrate, Log, is responsible for the NO hypersensitivity phenotype of  
79 a PPS (*mpa*) mutant. However, while genetic disruption of *log* completely restores NO  
80 resistance to an *mpa* strain *in vitro*, it does not fully rescue the virulence defect of this  
81 strain in mice (17). Therefore, there are likely to be other components of *M. tuberculosis*  
82 physiology whose regulation by the PPS is important for establishing lethal infections.

83 In addition to its central role in the post-translational regulation of various cellular  
84 pathways, an essential function of the eukaryotic proteasome is to maintain nutrient  
85 homeostasis by recycling amino acids (24, 25). In light of this observation, there has been  
86 interest in the question of whether or not the proteasome has a similar function in bacteria.  
87 Studies in *M. smegmatis* suggest that pupylation is required to maintain nitrogen  
88 homeostasis. Deletion of *pup* renders *M. smegmatis* more sensitive to nitrogen starvation  
89 (26), during which several enzymes involved in nitrogen metabolism are pupylated (21).  
90 In *M. tuberculosis*, amino acids serve as the primary nitrogen donors for most anabolic

91 processes (27, 28). Additionally, optimal *M. tuberculosis* growth, both *in vitro* and *in vivo*,  
92 requires the uptake of exogenous amino acids as a nitrogen source (29-32). It has  
93 therefore been hypothesized that the products of bulk proteolysis by the *M. tuberculosis*  
94 proteasome could be an important source of nitrogen under nutrient-limiting conditions.  
95 For this reason, we sought to determine if the *M. tuberculosis* proteasome contributed to  
96 nitrogen metabolism. Contrary to what was observed in *M. smegmatis*, we found that  
97 proteasomal degradation did not provide a survival advantage to *M. tuberculosis* during  
98 nitrogen starvation. However, we discovered that the proteasome was essential for the  
99 ability of *M. tuberculosis* to use nitrate as a nitrogen source. Through a genetic suppressor  
100 screen, we identified a putative PPS substrate whose inactivation rescued the ability of  
101 an *M. tuberculosis* PPS mutant to assimilate nitrogen from nitrate. Our data revealed an  
102 essential role for the PPS to facilitate the activity of nitrite reductase, possibly in two  
103 different ways, during growth in nitrate. Finally, we found that the abundance of the  
104 pupylome decreased when *M. tuberculosis* was grown in nitrate, the first condition known  
105 to alter proteasome substrate levels in *M. tuberculosis*.

106

## 107 **RESULTS**

108 **The *M. tuberculosis* proteasome does not provide a survival advantage during**  
109 **nitrogen starvation *in vitro*.** It has been previously reported that an *M. smegmatis pup*  
110 (also known as *prcS* in *M. smegmatis*) or *prcBA* mutant cannot survive as well as a wild  
111 type (WT) strain during several weeks of nitrogen starvation; however, the phenotypes of  
112 these mutants are almost fully complemented by *pup* alone, suggesting that proteasomal  
113 degradation itself may have a minor role in *M. smegmatis* nitrogen metabolism.

114 Nonetheless, it was proposed that the proteasome supported bacterial survival during  
115 nitrogen starvation by recycling amino acids (26). We therefore sought to test whether or  
116 not proteasomal degradation contributed to *M. tuberculosis* survival during nitrogen  
117 starvation. We incubated WT,  $\Delta mpa::hyg$  ("*mpa*") and  $\Delta prcBA::hyg$  ("*prcBA*") strains (see  
118 *SI Appendix*, Table S1) in Proskauer-Beck (PB) minimal medium lacking any nitrogen  
119 source and measured bacterial survival over time. In contrast to what is observed in *M.*  
120 *smegmatis*, we found that the WT strain had no survival advantage over the PPS mutant  
121 strains during three weeks of nitrogen starvation (Fig. 1A). Thus, amino acid recycling by  
122 the proteasome did not significantly contribute to nitrogen homeostasis in *M. tuberculosis*  
123 in our experiments. However, we cannot rule out a role for the proteasome in recycling  
124 amino acids under other conditions.

125

126 ***M. tuberculosis* requires the PPS in order to use nitrate as a nitrogen source.**

127 Following our observation that *M. tuberculosis* proteasome-defective strains did not have  
128 a survival disadvantage during nitrogen starvation, we next determined if the PPS was  
129 required for growth in a specific nitrogen source. *M. tuberculosis* can use both organic  
130 and inorganic sources of nitrogen, although asparagine and glutamate support growth  
131 most effectively *in vitro* (29). We compared the growth of WT and *mpa* strains in PB media  
132 supplemented with asparagine or glutamate, and found that the *mpa* mutant had a minor  
133 growth defect compared to the WT strain (Fig. 1B). When the same strains were provided  
134 the sub-optimal nitrogen sources arginine, ammonium, or nitrate, bacterial growth was  
135 predictably slower for both strains; remarkably, however, growth of the *mpa* mutant was  
136 almost completely abrogated in nitrate compared to the WT strain (Fig. 1C). A single copy

137 of *mpa* integrated on the chromosome restored growth of the *mpa* strain in nitrate (Fig.  
138 1D).

139 To determine if the inability of an *mpa* mutant to use nitrate was specifically related  
140 to a failure to degrade pupylated proteins, we assessed the growth of a *pafA* mutant  
141 (*pafA*::MycoMarT7) and the *prcBA* strain. Both mutants were attenuated for growth  
142 similarly to an *mpa* mutant in PB-nitrate, demonstrating that both pupylation by PafA and  
143 proteolysis by 20S CPs were required for using nitrate as a sole nitrogen source (Fig.  
144 1E).

145 *M. tuberculosis* uses a highly conserved pathway for nitrogen assimilation from  
146 nitrate (Fig. 1F). Once imported into the cell, nitrate is reduced to nitrite by the NarGHJI  
147 nitrate reductase complex (33). Nitrite is then reduced to ammonium by the nitrite  
148 reductase complex NirBD (34). Finally, ammonium is incorporated into glutamate and  
149 glutamine, which comprise the major intracellular nitrogen pool (27). Notably, *M.*  
150 *tuberculosis* secretes into its extracellular space any nitrite that cannot be immediately  
151 reduced to ammonium (34).

152 We hypothesized that the inability of PPS mutants to productively grow in PB-  
153 nitrate was caused by a failure of one or more reactions within nitrate catabolism. Upon  
154 growing *M. tuberculosis* in PB-nitrate, we discovered that supernatants of *pafA*, *mpa*, and  
155 *prcBA* mutant cultures contained ten- to fifteen-fold higher concentrations of nitrite than  
156 those of a WT strain (Fig. 1G). This result suggested that these mutants, while capable  
157 of importing and reducing nitrate, were unable to reduce nitrite to ammonium, causing the  
158 secretion of excess nitrite. Further supporting this model, an *mpa* mutant strain was



159 capable of growing in PB-ammonium, which bypasses the requirement of nitrite reduction,  
160 nearly as well as the WT strain (Fig. 1C).

161 In *M. tuberculosis*, the nitrite reductase complex is encoded by the *nirBD* (Rv0252-  
162 Rv0253) operon. An *M. tuberculosis nirBD* mutant is unable to grow when nitrate is  
163 provided as the single nitrogen source, implicating NirBD as the only nitrite reductase in  
164 *M. tuberculosis* (34). Therefore, we hypothesized that degradation of one or more  
165 pupylated proteins is required for the *in vivo* activity of NirBD.

166  
167 **Suppressor mutations in *hrcA* or *nadD* restore growth of an *mpa* mutant in nitrate.**

168 Most of an *mpa* mutant culture ultimately dies upon extended incubation in PB-nitrate  
169 (Fig. 1A), an observation that provided a powerful phenotype to screen for suppressor  
170 mutations that might identify specific substrates of the PPS whose degradation is  
171 necessary for NirBD activity. We previously generated a transposon mutant library of an  
172 *M. tuberculosis mpa* strain, consisting of approximately 72,000 unique double-mutant  
173 clones (17). To enrich for mutants with a suppressor phenotype, we incubated this library  
174 in PB-nitrate for four to five weeks, until cultures were turbid. Surviving bacteria were  
175 further expanded in rich media and subjected to a second round of incubation in PB-  
176 nitrate. We isolated 16 clones from six independent pools and tested them individually for  
177 growth in PB-nitrate. Interestingly, while all of the suppressor mutants grew more  
178 productively than the parental *mpa* strain, no mutant grew as well as the WT strain (*SI*  
179 *Appendix*, Fig. S1A).

180 To identify the suppressor mutations, we cloned DNA containing the transposon  
181 insertion from each of the 16 isolates. We identified two strains with unique transposon

182 insertions in the coding region of *hrcA* (Rv2374c). The remaining suppressor strains  
183 contained transposon insertions in different operons, with no obvious functional  
184 connections. We therefore suspected that these strains had additional, spontaneous  
185 mutations, possibly in *hrcA*. We PCR-amplified and sequenced the *hrcA* gene in the  
186 remaining mutants and discovered that five more strains had point mutations in *hrcA*. We  
187 next used whole-genome sequencing to identify mutations in the remaining nine  
188 suppressor mutants; seven strains had mutations in either the promoter or coding region  
189 of *nadD* (Rv2421c). Importantly, all of these suppressor mutations were the result of  
190 independent events (see *SI Appendix*, Table S1).

191  
192 **Expression of chaperonin genes promotes growth in nitrate.** Seven of the  
193 suppressor strains had mutations in *hrcA*, which encodes a transcriptional repressor that  
194 is conserved in many bacterial species as a regulator of molecular chaperones of the  
195 Hsp60 family [reviewed in (35)]. In *M. tuberculosis*, HrcA directly represses four genes,  
196 including three chaperonin-encoding genes *groES* (Rv3418c), *groEL1* (Rv3417c), and  
197 *groEL2* (Rv0440); and a fourth gene, Rv0991c, is uncharacterized (36) (Fig. 2A).  
198 Chaperonins, which are represented in all domains of life, facilitate the folding of protein  
199 substrates (37, 38). In bacteria, Hsp60-type chaperonins are composed of two stacked,  
200 heptameric rings of Hsp60 (GroEL) subunits, forming a chamber in which proteins fold;  
201 the chamber is capped by a heptamer of Hsp10 (GroES) subunits [reviewed in (39)]. *M.*  
202 *tuberculosis* is unusual among prokaryotes by encoding two GroEL homologues, both of  
203 which form complexes that are likely capped by GroES subunits (40). It was previously  
204 shown that an *M. tuberculosis* strain with a deletion-disruption in *hrcA* exhibits high

205 expression of *groEL1*, *groEL2*, and *groES* genes, the products of which are detectable in  
206 cell lysates by Coomassie brilliant blue staining of sodium dodecyl sulfate-polyacrylamide  
207 (SDS-PAGE) gels (36). Using this method, we observed protein species corresponding  
208 to GroEL1 or GroEL2 that were more abundant in an *mpa hrcA* double mutant ( $\Delta mpa::hyg$   
209 *hrcA::MycoMarT7*) (Fig. 2B) and in an *hrcA* single mutant ( $\Delta hrcA::hyg$ ), as well as in the  
210 other six *mpa hrcA* suppressor mutants (*SI Appendix*, Fig. S1B). We transformed an *mpa*  
211 *hrcA* strain with an integrative plasmid encoding *hrcA* under the control of its native  
212 promoter, creating strain MHD1344 (*SI Appendix*, Table S1). Complementation of the  
213 *hrcA* mutation successfully restored GroEL to lower, WT levels (Fig. 2B), and reversed  
214 the suppressor phenotypes, as observed by failed growth in PB-nitrate (Fig. 2C) and  
215 excessive nitrite secretion (Fig. 2D). Collectively, these data support the hypothesis that  
216 the expression of one or more genes of the HrcA regulon is required for nitrite reduction,  
217 and that HrcA regulon expression is reduced in PPS mutants.

218 To assess gene expression in a PPS mutant, we performed a global transcriptional  
219 analysis of WT and *mpa* strains grown in PB-nitrate by RNA sequencing (RNA-Seq) (see  
220 Experimental Procedures). Because an *mpa* mutant cannot productively grow in this  
221 media (Fig. 1C), we prepared RNA from cultures grown to early logarithmic phase [optical  
222 density at 580 nm ( $OD_{580}$ )=0.3]. RNA-Seq demonstrated that *groES* and *groEL2* were  
223 repressed in an *mpa* mutant compared to the parental WT strain (Fig. 2E). The remaining  
224 genes in the HrcA regulon, *groEL1* and Rv0991c, were also significantly repressed in an  
225 *mpa* mutant, although by a factor of less than two-fold (Dataset S1). This analysis  
226 suggested HrcA might be a PPS substrate.

227 To determine if the repression of the chaperonin genes leads to changes in protein  
228 abundance, we measured global protein levels in WT and *mpa* strains grown in PB-nitrate  
229 using tandem-mass-tag (TMT)-based quantitative mass spectrometry (MS) (see  
230 Experimental Procedures). Quantitative MS demonstrated that both GroEL2 and GroES  
231 were significantly less abundant in the *mpa* mutant compared to the WT strain; GroEL1  
232 and Rv0991c levels were not significantly changed (Dataset S2).

233 *groES* and *groEL2* are essential (41), thus we were unable to disrupt these genes  
234 to test their requirement for growth in PB-nitrate. However, previous work identified a  
235 mutant with a transposon insertion in *groEL1* (1), and additionally, we deleted and  
236 disrupted Rv0991c ( $\Delta$ Rv0991c::*hyg*) (*SI Appendix*, Table S1). Unlike a PPS mutant, the  
237 *groEL1* and Rv0991c mutants grew well in PB-nitrate (*SI Appendix*, Fig. S2A). These data  
238 suggest that the GroES-GroEL2 ("GroESL2") complex was needed for efficient nitrite  
239 reduction.

240

241 **Chaperonin production promotes NirBD activity in *M. tuberculosis*.** In order to begin  
242 to understand the association between chaperonins and nitrite reduction, we first checked  
243 if NirB or NirD abundance varied in WT, *mpa* and *mpa hrcA* *M. tuberculosis* strains in our  
244 MS data set (Dataset S2). While we observed a significant decrease in NirB abundance  
245 in an *mpa* mutant compared to the WT strain, this phenotype was not reversed upon  
246 disruption of *hrcA*; a similar trend was observed for NirD (*SI Appendix*, Fig. S2B). We thus  
247 concluded that changes in NirBD abundance alone could not explain the differences in  
248 nitrite reduction between the WT and *mpa* strains.

249 Bacterial chaperonins are required for folding many newly translated proteins, as  
250 well as for counteracting protein misfolding and aggregation under certain stress  
251 conditions (42-45). Consistent with this function of chaperonins, we always recovered  
252 less soluble protein from cell lysates of an *mpa* mutant than from the WT strain, a  
253 phenotype that was rescued by *hrcA* disruption (Fig. 2F). Based on these data, we  
254 hypothesized that chaperonins promote the activity of many *M. tuberculosis* proteins,  
255 including NirBD. To test this hypothesis, we measured NirBD activity in *M. tuberculosis*  
256 extracts. Bacterial extracts were supplemented with excess substrate (nitrite) and  
257 nicotinamide adenine dinucleotide (NAD), a cofactor that is required for NirBD activity  
258 (46). Compared to extracts made from the WT strain, nitrite reduction in *mpa* mutant  
259 extracts was at or below the limit of detection. Importantly, we observed a partial  
260 restoration of activity in *mpa hrcA* mutant extracts (Fig. 2G). This result suggested there  
261 was an intrinsic defect in NirBD activity in the *mpa* mutant that was restored by chaperonin  
262 overproduction. Notably, the incomplete rescue of nitrite reductase activity in an *mpa hrcA*  
263 strain might be explained by our observation that NirB levels were not restored by  
264 disruption of *hrcA* (*SI Appendix*, Fig. S2B).

265  
266 **HrcA can be pupylated *in vitro*.** The observations that the HrcA regulon was repressed  
267 in an *mpa* mutant (Fig. 2E and Dataset S1) and that the disruption of *hrcA* rescued a  
268 growth defect of a PPS mutant (Fig. 2C) suggested that HrcA might be a proteasome  
269 substrate. To test this hypothesis, we first determined if HrcA could be pupylated *in vitro*.  
270 We purified *M. tuberculosis* HrcA with carboxyl-terminal FLAG and hexahistidine (His<sub>6</sub>)  
271 tandem-affinity tags (HrcA<sub>TAP</sub>) from *Escherichia coli* (*E. coli*). Following incubation of

272 HrcA<sub>TAP</sub> with purified His<sub>6</sub>-Pup<sub>Glu</sub> and PafA-His<sub>6</sub>, which are sufficient to pupylate proteins,  
273 we observed the appearance of a higher-molecular weight species corresponding to the  
274 expected size of His<sub>6</sub>-Pup~HrcA<sub>TAP</sub> (Fig. 3A, compare lanes 1 and 2). In *M. tuberculosis*,  
275 proteins are usually pupylated at a specific lysine (16); we thus attempted to identify a  
276 pupylation site on HrcA. We made several HrcA<sub>TAP</sub> variants, each with lysine-to-arginine  
277 mutations in one or two of the six lysines in HrcA. Surprisingly, no single lysine was  
278 essential for the *in vitro* pupylation of HrcA<sub>TAP</sub> (Fig. 3A, lanes 3 through 7). Meanwhile,  
279 substitution of all six lysines abolished HrcA<sub>TAP</sub> pupylation (Fig. 3A, lane 8). Importantly,  
280 because the epitope tag on HrcA<sub>TAP</sub> contained two non-native lysines, this experiment  
281 demonstrated some substrate specificity for HrcA pupylation by PafA.

282 We sought to test if the pupylation of HrcA leads to its degradation *in vivo*.  
283 However, we were unable to observe endogenous HrcA in *M. tuberculosis* under any  
284 condition. We were unsuccessful in generating antibodies to detect HrcA in *M.*  
285 *tuberculosis* lysates, and HrcA was barely detected by TMT-based quantitative MS  
286 (Dataset S2). We also tried to use an epitope-tagged HrcA allele, but the tag abolished  
287 its repressor function. Finally, we introduced an *hrcA* allele lacking all of its lysines into  
288 an *hrcA* null mutant; however, this *hrcA* allele also completely lost its repressor activity.

289 Despite the technical limitations preventing us from observing pupylation or  
290 degradation of HrcA *in vivo*, our observation that *mpa*, *pafA* or *prcBA* mutants could not  
291 grow in nitrate (Fig. 1E) suggested that optimal chaperonin expression requires PPS-  
292 dependent proteolysis. We therefore predicted that the HrcA regulon would be repressed  
293 similarly in the *mpa* and *prcBA* mutants. We compared the abundance of GroEL2 in  
294 lysates from WT, *mpa*, and *prcBA* strains grown in PB-nitrate. We observed a similarly

295 low abundance of GroEL2 in both the *mpa* and *prcBA* strains compared to the WT strain  
296 (Fig. 3B). Collectively, the genetic evidence along with the pupylation assays suggest that  
297 the degradation of HrcA is necessary for maintaining chaperonin gene expression in *M.*  
298 *tuberculosis* grown in nitrate.

299

300 **Gain-of-function mutations in *nadD* rescue a defect in NAD availability in an *mpa***  
301 **mutant.** We identified four different point mutations in *nadD* (nicotinate mononucleotide  
302 adenylyltransferase) (*SI Appendix*, Table S1) that each rescued the growth of an *mpa*  
303 mutant in PB-nitrate (Fig. 4A). NadD catalyzes a committed step in the biosynthesis of  
304 NAD, a molecule that serves as an electron carrier in a wide variety of essential redox  
305 reactions (47). Through ATP hydrolysis, NadD transfers adenosine monophosphate to  
306 nicotinic acid mononucleotide (NaMN), generating nicotinic acid adenine dinucleotide  
307 (NaAD), a direct precursor to NAD (48). In *M. tuberculosis*, NadD is constitutively required  
308 for the production of NAD (49).

309 The four mutations we identified in *nadD* resulted in the amino acid substitutions  
310 V62A, T105I, G131V, and G188A (V, valine; A, alanine; T, threonine; I, isoleucine; G,  
311 glycine); two additional strains, recovered from independent mutant pools, also encoded  
312 a NadD<sub>V62A</sub> allele (see *SI Appendix*, Table S1). Consistent with their ability to grow in PB-  
313 nitrate, all four *mpa nadD* suppressor strains secreted low nitrite levels comparable to the  
314 parental WT strain, demonstrating that NirBD activity was restored in these strains (Fig.  
315 4B).

316 Because NadD is essential for the growth of *M. tuberculosis* (49), we predicted  
317 that these *nadD* suppressor mutations resulted in a gain of function. To test this

318 hypothesis, we transformed a single copy of either WT *nadD* or *nadD*<sub>V62A</sub> into an *mpa*  
319 strain and assessed growth of these transformants in PB-nitrate. As expected, ectopic  
320 expression of *nadD*<sub>V62A</sub> partially rescued the growth of the *mpa* parental strain, while  
321 ectopic expression of WT *nadD* had an intermediate phenotype. Likewise, ectopic  
322 expression of *nadD*<sub>V62A</sub> had a dominant effect to reduce nitrite secretion, even in the  
323 presence of the endogenous, WT *nadD* (Fig. 4C). We also measured the levels of total  
324 oxidized and reduced NAD (NAD<sup>+</sup> and NADH, respectively) in *M. tuberculosis* lysates  
325 from our strains. Interestingly, we observed a nearly three-fold reduction in NAD  
326 abundance in an *mpa* mutant relative to the parental WT strain. Importantly, all four *nadD*  
327 mutations restored NAD abundance in an *mpa* mutant to levels equal to or greater than  
328 that of the WT strain (Fig. 4D). Thus, *nadD* gain-of-function mutations rescued a defect  
329 in NAD availability in the *mpa* strain.

330 NAD depletion could affect many redox-associated enzymes in *M. tuberculosis*;  
331 however, there exists a direct link between NAD and nitrate catabolism. NirBD catalyzes  
332 electron transfer from NADH to nitrite, producing ammonium and NAD<sup>+</sup> (50). This reaction  
333 also requires the presence of NAD<sup>+</sup> itself (46). Accordingly, the reduced levels of NAD in  
334 the *mpa* mutant could contribute to this strain's defect in NirBD activity.

335 We sought to understand the molecular basis by which amino acid substitutions in  
336 NadD result in increased production of NAD *in vivo*. We produced WT and variant (V62A,  
337 T105I, G131V, and G188A) NadD in *E. coli*, and purified these proteins to homogeneity.  
338 We first measured NadD protein stability using a thermal shift assay (see Experimental  
339 Procedures). Remarkably, three of the four NadD variants (T105I, G131V, G188A)  
340 displayed a more than 13°C increase in melting temperature compared to WT NadD



341 (Table 1 and *SI Appendix*, Fig. S3A). We next measured the rate of ATP hydrolysis by  
342 WT and variant NadD upon incubation with NaMN. While NadD G131V and G188A  
343 hydrolyzed ATP at a higher rate, the remaining two NadD variants had less activity than  
344 the WT enzyme (Table 1).

345 We mapped the amino acid substitutions on the NadD crystal structure. T105I and  
346 G131V are located in the core of the NadD monomer (*SI Appendix*, Fig. S3B). This region  
347 is characterized by hydrophobic interactions between a central  $\beta$ -sheet and several  $\alpha$ -  
348 helices (51); accordingly, such hydrophobic amino acid substitutions may stabilize NadD  
349 by increasing core packing, which might explain their increased thermal stability. In  
350 contrast, substitutions V62A and G188A lie at a subunit-to-subunit interface in the NadD  
351 tetramer (*SI Appendix*, Fig. S3B). NadD forms both dimers and tetramers *in vitro* (51);  
352 while the state of NadD assembly *in vivo* is unknown, it is possible that substitutions at  
353 the surface of NadD monomers influence the oligomeric state of NadD to affect its  
354 catalytic activity (either positively or negatively) in *M. tuberculosis*. While we cannot yet  
355 explain why two of the NadD mutant alleles show slower activity *in vitro*, our genetic data  
356 suggest NadD activity is higher *in vivo* for all four mutants.

357 We also found that the low NAD levels in an *mpa* mutant were also restored by  
358 disruption of *hrcA* (Fig. 4D). It is possible that either the HrcA regulon is needed to support  
359 NAD synthesis, or that in the absence of Mpa function, one or more NAD-consuming  
360 enzymes deplete the cellular stores of this cofactor.

361  
362 **Nitrogen sources affect steady state pupylome levels.** Our results up to now suggest  
363 that the PPS degrades HrcA to allow for the expression of chaperonin genes in bacteria

364 growing in nitrate. However, we did not know whether these observations reflected the  
365 specific degradation of HrcA, or a mass degradation of substrates by the proteasome. To  
366 address this question, we grew *M. tuberculosis* in PB-Asn, which permits robust growth  
367 of an *mpa* mutant (Fig. 1B), or in PB-nitrate and quantified the abundance of pupylated  
368 proteins in bacterial lysates detectable by immunoblotting. We observed a nearly two-fold  
369 decrease in pupylome abundance in bacteria grown in PB-nitrate compared to PB-Asn.  
370 We also observed a decrease in the abundance of (unpupylated) inositol-3-phosphate  
371 synthase (Ino1), a model PPS substrate (16), but not of PrcB (Fig. 5A). This result  
372 suggested that there was an increase in the degradation of pupylated proteins, rather  
373 than a decrease in pupylation, during growth in PB-nitrate. To further test this point, we  
374 used a reporter protein, Pup-Zur-His<sub>6</sub>, to specifically observe the degradation of a "pre-  
375 pupylated" protein in *M. tuberculosis*. Zur (zinc uptake regulator, Rv2359) is an *M.*  
376 *tuberculosis* protein that lacks lysines, and therefore cannot be pupylated *in vivo*. Pup is  
377 translationally fused to Zur through a linear amide, rather than an isopeptide bond, and  
378 cannot be depupylated; thus, the abundance of this reporter specifically assesses  
379 proteolysis by the Mpa-proteasome (52). In WT *M. tuberculosis*, we observed a decrease  
380 in Pup-Zur-His<sub>6</sub> abundance in bacteria grown in PB-nitrate compared to bacteria cultured  
381 in PB-Asn. Meanwhile, in an *mpa* mutant, there was no difference in Pup-Zur-His<sub>6</sub> levels  
382 upon growth in either medium, supporting a model whereby the Mpa-proteasome  
383 degrades pupylated proteins during growth in nitrate (Fig. 5B).

384 Previous work has shown that total nitrogen starvation is associated with a  
385 decrease in pupylated proteins in *M. smegmatis*. This phenomenon was attributed to a  
386 greater abundance of 20S CPs upon nitrogen starvation, suggesting that *M. smegmatis*

387 regulates the production of the degradation machinery in response to nitrogen availability  
388 (26). However, we found that while the abundance of the pupylome, Ino1, and Pup-Zur-  
389 His<sub>6</sub> decreased during growth in PB-nitrate, the levels of Mpa, PrcA, and PrcB remained  
390 unchanged (Fig. 5B). Therefore, we propose that the regulation of proteasomal  
391 degradation in *M. tuberculosis* during growth in nitrate does not require significantly  
392 altering levels of the known proteolytic components.

393

## 394 **DISCUSSION**

395 In this work, we established that *M. tuberculosis* requires an intact PPS to assimilate  
396 nitrogen from nitrate. Specifically, the ability of *M. tuberculosis* to reduce nitrite depended  
397 on the expression of the Hsp60 chaperonin genes, including *groES* and *groEL2*. We  
398 found that HrcA, a repressor of the *groES* and *groEL1/2* genes, is most likely pupylated  
399 and degraded by the proteasome in order to allow for the production of the GroESL2  
400 complex during growth in nitrate. Additionally, we found that NAD levels were reduced in  
401 the absence of a functional PPS, which could also contribute to the observed defect in  
402 nitrite reduction in PPS mutants. Lastly, we showed that the abundance of PPS substrates  
403 changed depending on the nitrogen source provided to *M. tuberculosis*.

404 While mouse models of *M. tuberculosis* infection have demonstrated a requirement  
405 for bacterial uptake of asparagine and aspartate as nitrogen sources (30, 31), the  
406 importance of nitrate as a nutrient during infection is less clear. An *M. tuberculosis narG*  
407 mutant, which is unable to reduce nitrate, is fully virulent in mice (53). However, unlike in  
408 humans, *M. tuberculosis* lesions in most inbred mouse lines are not hypoxic (53, 54);  
409 because nitrate import and reduction occur most abundantly under anaerobic conditions

410 (55-57), these infection models may not accurately reflect nitrate utilization during a  
411 human infection.

412 Our results suggest that *M. tuberculosis* NirBD activity requires de-repression of  
413 the HrcA regulon and support a model by which HrcA is degraded in a PPS-dependent  
414 manner (Fig. 6). Studies of HrcA from other bacterial species have shown that this  
415 repressor acts as a thermosensor: an increase in temperature induces the dissociation of  
416 HrcA from DNA, presumably allowing for the expression of factors necessary to respond  
417 to heat-induced protein misfolding (58, 59). We observed that the PPS alleviates HrcA  
418 repression in the absence of heat shock, suggesting that there are other ways of inducing  
419 the expression of the *hsp60* protein quality control genes in *M. tuberculosis*. Importantly,  
420 it is unknown how many *M. tuberculosis* proteins depend on GroESL2 for folding. The  
421 identification of other GroESL2 substrates could potentially uncover additional pathways  
422 whose function depends on PPS-mediated control of chaperonin gene expression.  
423 Importantly, these pathways may at least partially explain how defects in the PPS lead to  
424 highly attenuated bacteria in animals.

425 According to the most well-characterized model of chaperonin activity in *E. coli*,  
426 misfolded or unfolded proteins become encapsulated within a GroES-GroEL chamber, a  
427 hydrophobic space in which substrates fold (37, 38). NirD has a mass of 12.5 kD, a size  
428 that is within the range of most *E. coli* GroEL substrates (60); in contrast, the 90 kD NirB  
429 subunit is too large to be fully encapsulated. Nonetheless, a mechanism of chaperonin-  
430 mediated folding of large proteins without encapsulation has been described (61, 62), and  
431 several high-molecular weight *E. coli* proteins have been identified as *in vivo* GroEL

432 substrates (60). Thus, it is possible that NirB and/or NirD are endogenous substrates of  
433 GroESL2 in *M. tuberculosis*.

434         While a failure of *M. tuberculosis* to maintain chaperonin levels is associated with  
435 a loss of NirBD function, we have also shown that an *mpa* mutant grown in nitrate lacks  
436 WT levels of NAD, which is required for NirBD activity. Proteomic analysis of WT and *mpa*  
437 strains did not identify alterations in the abundance of any enzymes within the NAD  
438 biosynthetic pathway that could explain the failure of an *mpa* mutant to maintain WT NAD  
439 levels (Dataset S2). It is possible that the NAD pool is exhausted by the accumulation of  
440 one or more PPS substrates that consume NAD. However, it is telling that in addition to  
441 compensatory mutations in *nadD*, *hrcA* disruption is sufficient to restore NAD levels in an  
442 *mpa* mutant. Taken together, these observations suggest that GroESL2 may also  
443 promote the folding or assembly of NadD or other enzymes in the NAD synthetic pathway.  
444 In turn, the gain-of-function mutations in *nadD* that were selected for in our suppressor  
445 screen may allow NadD to remain functional in spite of reduced chaperonin levels.  
446 Importantly, NadD is thought to be essential in most bacteria, and is of interest as a drug  
447 target in a potentially diverse set of pathogens, including *M. tuberculosis* (49, 63). Thus,  
448 the novel NadD variants that we describe here highlight the importance of NadD activity  
449 under stress conditions and strengthen the potential of NadD as an underappreciated  
450 drug target.

451         In a study using *M. smegmatis*, Gur and colleagues found that the pupylome is  
452 less abundant during nitrogen starvation, an observation that is similar to what we  
453 observed with *M. tuberculosis* grown in nitrate broth. It was proposed that altered levels  
454 of components of the PPS are responsible for this phenotype in *M. smegmatis* (26). In

455 contrast, we did not observe conspicuous changes in proteasome component abundance  
456 in *M. tuberculosis* despite a dramatic change in substrate abundance, suggesting that  
457 there are differences in the regulation of proteasomal activity between these bacterial  
458 species. Instead of altering PPS component levels, it is conceivable that there are post-  
459 translational modifications on the proteasome itself that alter its activity. For example, *M.*  
460 *tuberculosis* kinases PknA and PknB can phosphorylate PrcA and PrcB (64); although  
461 there is no indication that this activity occurs in a physiological setting, phosphorylation  
462 could potentially affect the activity of 20S CPs. Additionally, there may be factors that  
463 modulate the association of Mpa with the 20S CP, since attempts to observe a robust  
464 Mpa-20S CP interaction *in vitro* have been unsuccessful (65).

465 In addition to identifying a novel role of the *M. tuberculosis* PPS in regulating  
466 chaperonin and NAD levels during growth in nitrate, we found a specific condition during  
467 which proteasomal degradation appears to be stimulated. Because the Hsp60 system is  
468 undoubtedly required for the function of numerous proteins, it seems likely that other  
469 environmental cues could activate proteasomal degradation to induce *hsp60* regulon  
470 expression. Thus, the molecular mechanisms by which PPS function might be altered, as  
471 well as other growth conditions that promote proteolysis, warrant further investigation.

472

## 473 **EXPERIMENTAL PROCEDURES**

474 **Bacterial strains, plasmids, primers, and culture conditions.** Bacterial strains,  
475 plasmids, and primers used in this study are listed in *SI Appendix*, Table S1. Chemicals  
476 used for making all buffers and bacterial media were purchased from ThermoFisher, Inc.  
477 unless otherwise indicated. *M. tuberculosis* was grown in "7H9" [BD Difco Middlebrook

478 7H9 broth with 0.2% glycerol and supplemented with 0.5% bovine serum albumin (BSA),  
479 0.2% dextrose, 0.085% sodium chloride, and 0.05% Tween-80]. For culturing *M.*  
480 *tuberculosis* in single nitrogen sources, a base of Proskauer-Beck (PB) minimal medium  
481 (66) with no nitrogen source ("PB-base") was prepared with 0.5% potassium phosphate  
482 monobasic, 0.06% magnesium sulfate heptahydrate, 1.5% glycerol, 0.25% magnesium  
483 citrate dibasic anhydrous, and 0.05% Tween-80. The following nitrogen sources were  
484 added to a final concentration of 10 mM: asparagine (PB-Asn), glutamate (PB-Glu),  
485 arginine (PB-Arg), sodium nitrate (PB-nitrate), or ammonium chloride (PB-ammonium);  
486 pH was adjusted to 6.4 after nitrogen addition. PB broths were autoclaved or filtered prior  
487 to use. *M. tuberculosis* was incubated at 37°C for all experiments.

488 For solid media, *M. tuberculosis* was grown on "7H11" agar (BD Difco Middlebrook  
489 7H11) containing 0.5% glycerol and supplemented with 10% final volume of BBL  
490 Middlebrook OADC Enrichment. For selection of *M. tuberculosis*, the following antibiotics  
491 were used as needed: kanamycin 50 µg/ml, hygromycin 50 µg/ml, and gentamicin 15  
492 µg/ml.

493 *E. coli* was cultured in BD Difco Luria-Bertani (LB) broth or on LB-Agar. Media were  
494 supplemented with the following antibiotics as needed: kanamycin 100 µg/ml, hygromycin  
495 150 µg/ml, and gentamicin 15 µg/ml.

496 For all experiments in which *M. tuberculosis* was cultured in PB broth, bacteria  
497 were first grown in 7H9 to an OD<sub>580</sub> of 0.5 - 0.8, washed three times in PBS-T [phosphate  
498 buffered saline (Corning) with 0.05% Tween-80], and resuspended in the appropriate PB  
499 broth. For growth curves, bacteria were harvested by centrifugation at 500 × *g* for five  
500 minutes to remove large clumps of bacteria prior to dilution into fresh broth.

501 A detailed description of plasmid construction is provided in *SI Appendix*,  
502 Supplementary Experimental Procedures.

503

504 **Protein purification, antibody production, and immunoblotting.** Purification of PafA-  
505 His<sub>6</sub> and His<sub>6</sub>-Pup<sub>Glu</sub> was described previously (9, 15). HrcA was made with a C-terminal  
506 affinity tag consisting of FLAG and His<sub>6</sub> epitopes separated by a five-amino acid linker  
507 ("HrcA<sub>TAP</sub>"). *M. smegmatis* PrcB was made with a C-terminal His<sub>6</sub> (smPrcB-His<sub>6</sub>). HrcA<sub>TAP</sub>,  
508 smPrcB-His<sub>6</sub>, and PrcA-His<sub>6</sub> were produced in *E. coli* strain ER2566 and purified by  
509 affinity chromatography using Ni-NTA agarose (Qiagen) according to the manufacturer's  
510 instructions (PrcA and PrcB were purified under urea denaturing conditions). To make  
511 rabbit polyclonal immune serum, approximately 200 µg PrcA-His<sub>6</sub> or smPrcB was used  
512 to immunize rabbits (Covance, Denver, PA). Purification of recombinant NadD is  
513 described in *SI Appendix*, Supplementary Experimental Procedures. Antibodies to *M.*  
514 *tuberculosis* DlaT were a gift from R. Bryk and C. Nathan.

515 Separation of proteins in *in vitro* assays and in *M. tuberculosis* lysates was  
516 performed using 10% sodium dodecyl sulfate-polyacrylamide (SDS-PAGE) gels, with the  
517 exception of the experiment shown in Fig. 5B, which used a 15% SDS-PAGE gel. Bio-  
518 Safe Coomassie Stain (Bio-Rad) was used to stain gels. For immunoblots, proteins were  
519 transferred from SDS-PAGE gels to nitrocellulose membranes (GE Amersham), and  
520 analyzed by immunoblotting as indicated. Detailed immunoblotting procedures are found  
521 in *SI Appendix*, Supplementary Experimental Procedures.

522 To quantify GroEL2 abundance in Fig. 3B, we used ImageJ (<https://imagej.nih.gov>)  
523 to measure the pixel density of GroEL2 and DlaT signals in immunoblot images. To



524 normalize each lane, the GroEL2 density was divided by the D1aT density. Quantification  
525 of pupylome and Pup-Zur-His<sub>6</sub> abundances in Fig. 5 was performed in the same manner,  
526 using the PrcB signal to normalize the pupylome or His signal for each lane. For the  
527 fractionation experiment shown in Fig. 2F, total protein content in soluble and insoluble  
528 lysate fractions was determined by separating samples on SDS-PAGE gels, staining gels  
529 with Coomassie brilliant blue, and using ImageJ to measure pixel density in scanned  
530 images.

531  
532 **Preparation of *M. tuberculosis* extracts.** To generate protein extracts for gel separation  
533 and immunoblotting, *M. tuberculosis* cultures were grown to an OD<sub>580</sub> of 0.3. Equal  
534 amounts of bacteria were harvested by centrifugation, resuspended in lysis buffer (50 mM  
535 Tris, 150 mM sodium chloride, and 1 mM ethylenediaminetetraacetic acid (EDTA), pH  
536 8.0). and transferred to a tube containing 250 µl of 0.1 mm zirconia beads (BioSpec  
537 Products). Bacteria were lysed using a mechanical bead-beater (BioSpec Products).  
538 Whole lysates were mixed with 4 × SDS sample buffer (250 mM Tris pH 6.8, 2% SDS,  
539 20% 2-mercaptoethanol, 40% glycerol, 1% bromophenol blue) to a 1 × final concentration,  
540 and samples were boiled for 5 minutes. For preparing lysates from *M. tuberculosis* grown  
541 in 7H9, which contains BSA, an additional wash step with PBS-T was done prior to  
542 resuspension of bacteria in lysis buffer.

543 For the fractionation experiment shown in Fig. 2F, bacteria were lysed as  
544 described above; whole lysate was centrifuged at 16,000 × g for five minutes to pellet  
545 insoluble material. Supernatants were mixed with 4 × SDS sample buffer, and pellets

546 were resuspended in 250  $\mu$ l of fresh lysis buffer and mixed with 4  $\times$  SDS sample buffer;  
547 each sample was boiled for 5 minutes.

548

549 **Sequencing of suppressor mutants.** *M. tuberculosis* chromosomal DNA was purified  
550 as described previously (67). Transposon insertion sites were cloned from *M. tuberculosis*  
551 genomic DNA, transformed into S17- $\lambda$ pir, and sequenced as previously described (1). For  
552 strains MHD149, MHD1294, MHD1300, MHD1301, MHD1302, MHD1304, MHD1306,  
553 MHD1307, MHD1308, and MHD1311, whole-genome sequencing was done by the  
554 Genome Technology Center at NYU Langone Health using an Illumina Hi-Seq platform.  
555 Reads were mapped to the H37Rv reference genome (NCBI) using BWA ([http://bio-](http://bio-bwa.sourceforge.net/)  
556 [bwa.sourceforge.net/](http://bio-bwa.sourceforge.net/)) and SAMtools (<http://samtools.sourceforge.net/>). Identification of  
557 nucleotide mutations was performed using HaplotypeCaller (Broad Institute).

558

559 **Quantification of nitrite reductase activity.** All experiments were performed using  
560 cultures growing in PB-nitrate to an OD<sub>580</sub> of 0.3. The concentration of nitrite in *M.*  
561 *tuberculosis* culture supernatants was measured using the Griess assay (68) by mixing  
562 supernatant 1:1 with Griess reagent (2.5% phosphoric acid, 0.5% sulfanilamide, 0.05%  
563 N-(1-naphthyl)-ethylenediamine), incubating for 10 minutes at 25°C, and measuring  
564 absorbance at 550 nm ( $A_{550}$ ). A set of sodium nitrite solutions was used to make a  
565 standard curve for  $A_{550}$  measurements.

566 Direct measurement of nitrite reductase activity in *M. tuberculosis* extracts was  
567 performed as described previously, using NADH oxidation as a measure of NirBD activity  
568 (46). To eliminate background oxidation by NADH dehydrogenase, a membrane-

569 associated complex, bacterial lysates were filtered and subjected to ultracentrifugation at  
570  $150,000 \times g$  for 2 hours to remove insoluble material. Extracts were then normalized by  
571 total protein content after measuring the protein concentration using the Bio-Rad Protein  
572 Assay. NADH was measured in the reactions by  $A_{340}$ . Background NADH oxidation by  
573 extracts in the absence of sodium nitrite was measured and determined to be negligible.  
574

575 **Transcriptional analysis.** To analyze gene expression, RNA was purified as previously  
576 described (69) from *M. tuberculosis* cultures grown in PB-nitrate to an  $OD_{580}$  of 0.3.  
577 Library preparation, sequencing by Illumina HiSeq, and analysis were performed by  
578 GENEWIZ, Inc. Sequence reads were mapped to the H37Rv genome using Bowtie2  
579 (<http://bowtie-bio.sourceforge.net/bowtie2/index.shtml>). Unique gene hit counts were  
580 calculated using Subread (<http://subread.sourceforge.net/>), and differential gene  
581 expression analysis was performed using DeSeq2  
582 (<https://bioconductor.org/packages/release/bioc/html/DESeq2.html>). To compare gene  
583 expression between strains, the Wald test was used to generate  $p$ -values and  $\log_2$  fold  
584 changes. Genes with an adjusted  $p$ -value  $< 0.05$  and absolute  $\log_2$  fold change  $> 1$  were  
585 called as differentially expressed genes for each comparison. Global gene expression  
586 analyses in WT and MHD149 strains is provided in Dataset S1. Raw sequencing data  
587 files are available in a PATRIC public workspace  
588 (<https://patricbrc.org/workspace/public/shb360@patricbrc.org/shb2018>).

589  
590 **Mass spectrometry:** For analysis of protein content in *M. tuberculosis* strains, bacteria  
591 were grown in PB-nitrate to an  $OD_{580}$  of 0.3. Equal amounts of bacteria were harvested

592 by centrifugation, resuspended in freshly-prepared denaturing lysis buffer (100 mM Tris,  
593 1 mM EDTA, 8M urea, pH 8.0), and lysed by bead beating. Whole lysates were  
594 centrifuged at  $16,000 \times g$  for 5 minutes to pellet the urea-insoluble material. Supernatants  
595 were centrifuged through a 0.22  $\mu\text{m}$  Spin-X cellulose-acetate filter (Corning) and stored  
596 at  $-80^\circ\text{C}$ . Detailed methods for TMT-based quantitative MS are in *SI Appendix*,  
597 Supplementary Experimental Procedures. A comparison of global protein abundances  
598 between WT, MHD149, and MHD1297 is provided in Dataset S2. Raw peptide data is  
599 available in a PATRIC public workspace  
600 (<https://patricbrc.org/workspace/public/shb360@patricbrc.org/shb2018>).

601  
602 ***In vitro* pupylation of HrcA.** Pupylation assays were performed as described previously  
603 (10, 15). Briefly, reaction mixtures contained 1  $\mu\text{M}$  His<sub>6</sub>-Pup<sub>Glu</sub>, 1  $\mu\text{M}$  HrcA<sub>TAP</sub>, and 0.5  $\mu\text{M}$   
604 PafA-His<sub>6</sub> at pH 8.0 in the presence of 5 mM ATP, 50 mM Tris, 20 mM magnesium  
605 chloride, 10% glycerol, 1 mM dithiothreitol, and 150 mM sodium chloride. Reactions were  
606 incubated overnight at  $25^\circ\text{C}$ .

607  
608 **Quantification of NAD.** Total NAD in *M. tuberculosis* lysates was quantified using the  
609 NAD/NADH Quantitation Kit (Sigma-Aldrich). Preparation of protein-free bacterial  
610 extracts and NAD quantification were performed according to the manufacturer's  
611 instructions.

612  
613 **NadD kinetics and stability assays.** Thermal stability of NadD variants was measured  
614 using differential scanning fluorimetry (thermal shift assay). Differential scanning

615 fluorimetry was performed using a CFX96 Touch Real-Time PCR detection system and  
616 the florescent dye SYPRO Orange stock concentration at a final concentration of  $2 \times$  in  
617 96-well PCR plates. The initial fluorescence signal was measured after five minutes of  
618 temperature equilibration at 25°C followed by measurements at every 1°C min<sup>-1</sup> until  
619 reaching 95°C. The wavelength of excitation and emission were 490 nm and 580 nm,  
620 respectively. For each experiment, the protein was run alone and in the presence of 10  
621 mM Mg-ATP. Experiments were carried out with at least three samples per condition;  
622 results were expressed as mean values  $\pm$  the standard error of the mean. Melting  
623 temperatures were calculated using CFX Manager 3.1 software's d(RFU)/dT peak finder.

624       Reaction mixtures for the assay of nicotinic acid adenylyl transferase activity of  
625 NadD contained 100 mM HEPES-NaOH, pH 7.4, 10 mM magnesium chloride, 1 mM  
626 NaMN, 0.1 mM ATP (Sigma), 5 mU inorganic pyrophosphatase (Sigma) and 20  $\mu$ g  
627 purified NadD in a total volume of 0.1 ml. Reactions were performed in a clear, flat-  
628 bottomed 96-well plate at room temperature. After incubation for 10 min., inorganic  
629 phosphate was detected using the Malachite Green assay (70).

630

631 **Statistical significance.** With the exception of TMT-based proteomics and RNA-seq  
632 analyses, all *p*-values were calculated using Welch's T-test.

633

#### 634 **AUTHOR CONTRIBUTIONS**

635 S.H.B., J.B.J., A.D., K.V.K., B.U., and K.H.D. designed research; S.H.B., J.B.J., A.D.,  
636 C.T.C., and J.S.R. performed research; S.H.B., K.V.K., and K.H.D. wrote the manuscript.

637

638 **ACKNOWLEDGEMENTS**

639 This work was supported by National Institutes of Health (NIH) grants R01 HL092774 and  
640 AI088075 awarded to K.H.D. S.H.B. and J.B.J. were supported by NIH grant T32  
641 AT007180. S.H.B. also received support from the Jan T. Vilcek Endowed Fellowship  
642 Fund. K.V.K. was supported by NIH grant R03AI117361. We thank A. Osterman for  
643 providing the NadD expression construct. We thank C. Kenner, J. Li and R. Reed for  
644 assistance with NadD purifications. We thank S. Ehrt for the *prcBA* mutant and R. Copin  
645 for assistance in analysis of whole-genome sequencing data. We thank M. Samanovic,  
646 S. Zhang, A. Darwin, and members of the A. Darwin lab for helpful discussions.

## 647 REFERENCES

- 648 1. Darwin KH, Ehrt S, Gutierrez-Ramos JC, Weich N, & Nathan CF (2003) The  
649 proteasome of Mycobacterium tuberculosis is required for resistance to nitric  
650 oxide. *Science* 302(5652):1963-1966.
- 651 2. Gandotra S, Schnappinger D, Monteleone M, Hillen W, & Ehrt S (2007) In vivo  
652 gene silencing identifies the Mycobacterium tuberculosis proteasome as  
653 essential for the bacteria to persist in mice. *Nat Med* 13(12):1515-1520.
- 654 3. Lin G, *et al.* (2006) Mycobacterium tuberculosis prcBA genes encode a gated  
655 proteasome with broad oligopeptide specificity. *Mol Microbiol* 59(5):1405-1416.
- 656 4. Groll M, *et al.* (1997) Structure of 20S proteasome from yeast at 2.4 Å resolution.  
657 *Nature* 386(6624):463-471.
- 658 5. Knipfer N & Shrader TE (1997) Inactivation of the 20S proteasome in  
659 Mycobacterium smegmatis. *Mol Microbiol* 25(2):375-383.
- 660 6. Becker SH & Darwin KH (2017) Bacterial Proteasomes: Mechanistic and  
661 Functional Insights. *Microbiol Mol Biol Rev* 81(1).
- 662 7. Lehmann G, Udasin RG, Livneh I, & Ciechanover A (2017) Identification of  
663 UBact, a ubiquitin-like protein, along with other homologous components of a  
664 conjugation system and the proteasome in different gram-negative bacteria.  
665 *Biochem Biophys Res Commun* 483(3):946-950.
- 666 8. MacMicking JD, *et al.* (1997) Identification of nitric oxide synthase as a protective  
667 locus against tuberculosis. *Proc Natl Acad Sci U S A* 94(10):5243-5248.
- 668 9. Pearce MJ, Mintseris J, Ferreyra J, Gygi SP, & Darwin KH (2008) Ubiquitin-like  
669 protein involved in the proteasome pathway of Mycobacterium tuberculosis.  
670 *Science* 322(5904):1104-1107.
- 671 10. Cerda-Maira FA, *et al.* (2011) Reconstitution of the Mycobacterium tuberculosis  
672 pupylation pathway in Escherichia coli. *EMBO Rep* 12(8):863-870.
- 673 11. Burns KE, Liu WT, Boshoff HI, Dorrestein PC, & Barry CE, 3rd (2009)  
674 Proteasomal protein degradation in Mycobacteria is dependent upon a  
675 prokaryotic ubiquitin-like protein. *J Biol Chem* 284(5):3069-3075.
- 676 12. Darwin KH, Lin G, Chen Z, Li H, & Nathan CF (2005) Characterization of a  
677 Mycobacterium tuberculosis proteasomal ATPase homologue. *Mol Microbiol*  
678 55(2):561-571.
- 679 13. Burns KE, *et al.* (2010) "Depupylation" of prokaryotic ubiquitin-like protein from  
680 mycobacterial proteasome substrates. *Mol Cell* 39(5):821-827.
- 681 14. Imkamp F, *et al.* (2010) Deletion of dop in Mycobacterium smegmatis abolishes  
682 pupylation of protein substrates in vivo. *Mol Microbiol* 75(3):744-754.
- 683 15. Zhang S, *et al.* (2017) Mycobacterium tuberculosis Proteasome Accessory  
684 Factor A (PafA) Can Transfer Prokaryotic Ubiquitin-Like Protein (Pup) between  
685 Substrates. *MBio* 8(1).
- 686 16. Festa RA, *et al.* (2010) Prokaryotic ubiquitin-like protein (Pup) proteome of  
687 Mycobacterium tuberculosis [corrected]. *PLoS One* 5(1):e8589.
- 688 17. Samanovic MI, *et al.* (2015) Proteasomal control of cytokinin synthesis protects  
689 Mycobacterium tuberculosis against nitric oxide. *Mol Cell* 57(6):984-994.
- 690 18. Watrous J, *et al.* (2010) Expansion of the mycobacterial "PUPylome". *Mol Biosyst*  
691 6(2):376-385.

- 692 19. Poulsen C, *et al.* (2010) Proteome-wide identification of mycobacterial pupylation  
693 targets. *Mol Syst Biol* 6:386.
- 694 20. Kuberl A, *et al.* (2014) Pupylated proteins in *Corynebacterium glutamicum*  
695 revealed by MudPIT analysis. *Proteomics* 14(12):1531-1542.
- 696 21. Fascellaro G, *et al.* (2016) Comprehensive Proteomic Analysis of Nitrogen-  
697 Starved *Mycobacterium smegmatis* Deltapup Reveals the Impact of Pupylation  
698 on Nitrogen Stress Response. *J Proteome Res* 15(8):2812-2825.
- 699 22. Kuberl A, Polen T, & Bott M (2016) The pupylation machinery is involved in iron  
700 homeostasis by targeting the iron storage protein ferritin. *Proc Natl Acad Sci U S*  
701 *A* 113(17):4806-4811.
- 702 23. Lamichhane G, *et al.* (2006) Deletion of a *Mycobacterium tuberculosis*  
703 proteasomal ATPase homologue gene produces a slow-growing strain that  
704 persists in host tissues. *J Infect Dis* 194(9):1233-1240.
- 705 24. Vabulas RM & Hartl FU (2005) Protein synthesis upon acute nutrient restriction  
706 relies on proteasome function. *Science* 310(5756):1960-1963.
- 707 25. Suraweera A, Munch C, Hanssum A, & Bertolotti A (2012) Failure of amino acid  
708 homeostasis causes cell death following proteasome inhibition. *Mol Cell*  
709 48(2):242-253.
- 710 26. Elharar Y, *et al.* (2014) Survival of mycobacteria depends on proteasome-  
711 mediated amino acid recycling under nutrient limitation. *EMBO J* 33(16):1802-  
712 1814.
- 713 27. Viljoen AJ, Kirsten CJ, Baker B, van Helden PD, & Wiid IJ (2013) The role of  
714 glutamine oxoglutarate aminotransferase and glutamate dehydrogenase in  
715 nitrogen metabolism in *Mycobacterium bovis* BCG. *PLoS One* 8(12):e84452.
- 716 28. Gouzy A, Poquet Y, & Neyrolles O (2014) Nitrogen metabolism in *Mycobacterium*  
717 *tuberculosis* physiology and virulence. in *Nat Rev Microbiol*, pp 729-737.
- 718 29. Song H & Niederweis M (2012) Uptake of sulfate but not phosphate by  
719 *Mycobacterium tuberculosis* is slower than that for *Mycobacterium smegmatis*. *J*  
720 *Bacteriol* 194(5):956-964.
- 721 30. Gouzy A, *et al.* (2014) *Mycobacterium tuberculosis* exploits asparagine to  
722 assimilate nitrogen and resist acid stress during infection. *PLoS Pathog*  
723 10(2):e1003928.
- 724 31. Gouzy A, *et al.* (2013) *Mycobacterium tuberculosis* nitrogen assimilation and host  
725 colonization require aspartate. *Nat Chem Biol* 9(11):674-676.
- 726 32. Rieck B, *et al.* (2017) PknG senses amino acid availability to control metabolism  
727 and virulence of *Mycobacterium tuberculosis*. *PLoS Pathog* 13(5):e1006399.
- 728 33. Stermann M, Sedlacek L, Maass S, & Bange FC (2004) A promoter mutation  
729 causes differential nitrate reductase activity of *Mycobacterium tuberculosis* and  
730 *Mycobacterium bovis*. *J Bacteriol* 186(9):2856-2861.
- 731 34. Malm S, *et al.* (2009) The roles of the nitrate reductase NarGHJI, the nitrite  
732 reductase NirBD and the response regulator GlnR in nitrate assimilation of  
733 *Mycobacterium tuberculosis*. *Microbiology* 155(Pt 4):1332-1339.
- 734 35. Narberhaus F (1999) Negative regulation of bacterial heat shock genes. *Mol*  
735 *Microbiol* 31(1):1-8.



- 736 36. Stewart GR, *et al.* (2002) Dissection of the heat-shock response in  
737 Mycobacterium tuberculosis using mutants and microarrays. *Microbiology* 148(Pt  
738 10):3129-3138.
- 739 37. Martin J, Mayhew M, Langer T, & Hartl FU (1993) The reaction cycle of GroEL  
740 and GroES in chaperonin-assisted protein folding. *Nature* 366(6452):228-233.
- 741 38. Langer T, Pfeifer G, Martin J, Baumeister W, & Hartl FU (1992) Chaperonin-  
742 mediated protein folding: GroES binds to one end of the GroEL cylinder, which  
743 accommodates the protein substrate within its central cavity. *EMBO J*  
744 11(13):4757-4765.
- 745 39. Hayer-Hartl M, Bracher A, & Hartl FU (2016) The GroEL-GroES Chaperonin  
746 Machine: A Nano-Cage for Protein Folding. *Trends Biochem Sci* 41(1):62-76.
- 747 40. Kong TH, Coates AR, Butcher PD, Hickman CJ, & Shinnick TM (1993)  
748 Mycobacterium tuberculosis expresses two chaperonin-60 homologs. *Proc Natl*  
749 *Acad Sci U S A* 90(7):2608-2612.
- 750 41. DeJesus MA, *et al.* (2017) Comprehensive Essentiality Analysis of the  
751 Mycobacterium tuberculosis Genome via Saturating Transposon Mutagenesis.  
752 *MBio* 8(1).
- 753 42. Susin MF, Baldini RL, Gueiros-Filho F, & Gomes SL (2006) GroES/GroEL and  
754 DnaK/DnaJ have distinct roles in stress responses and during cell cycle  
755 progression in *Caulobacter crescentus*. *J Bacteriol* 188(23):8044-8053.
- 756 43. Chapman E, *et al.* (2006) Global aggregation of newly translated proteins in an  
757 *Escherichia coli* strain deficient of the chaperonin GroEL. *Proc Natl Acad Sci U S*  
758 *A* 103(43):15800-15805.
- 759 44. Maisnier-Patin S, *et al.* (2005) Genomic buffering mitigates the effects of  
760 deleterious mutations in bacteria. *Nat Genet* 37(12):1376-1379.
- 761 45. Kerner MJ, *et al.* (2005) Proteome-wide analysis of chaperonin-dependent  
762 protein folding in *Escherichia coli*. *Cell* 122(2):209-220.
- 763 46. Coleman KJ, Cornish-Bowden A, & Cole JA (1978) Purification and properties of  
764 nitrite reductase from *Escherichia coli* K12. *Biochem J* 175(2):483-493.
- 765 47. Belenky P, Bogan KL, & Brenner C (2007) NAD<sup>+</sup> metabolism in health and  
766 disease. *Trends Biochem Sci* 32(1):12-19.
- 767 48. Gerdes SY, *et al.* (2002) From genetic footprinting to antimicrobial drug targets:  
768 examples in cofactor biosynthetic pathways. *J Bacteriol* 184(16):4555-4572.
- 769 49. Rodionova IA, *et al.* (2014) Metabolic and bactericidal effects of targeted  
770 suppression of NadD and NadE enzymes in mycobacteria. *MBio* 5(1).
- 771 50. Kemp JD & Atkinson DE (1966) Nitrite reductase of *Escherichia coli* specific for  
772 reduced nicotinamide adenine dinucleotide. *J Bacteriol* 92(3):628-634.
- 773 51. Rodionova IA, *et al.* (2015) Mycobacterial nicotinate mononucleotide  
774 adenylyltransferase: structure, mechanism, and implications for drug discovery. *J*  
775 *Biol Chem* 290(12):7693-7706.
- 776 52. Burns KE, Pearce MJ, & Darwin KH (2010) Prokaryotic ubiquitin-like protein  
777 provides a two-part degron to Mycobacterium proteasome substrates. *J Bacteriol*  
778 192(11):2933-2935.
- 779 53. Aly S, *et al.* (2006) Oxygen status of lung granulomas in Mycobacterium  
780 tuberculosis-infected mice. *J Pathol* 210(3):298-305.

- 781 54. Via LE, *et al.* (2008) Tuberculous granulomas are hypoxic in guinea pigs, rabbits,  
782 and nonhuman primates. *Infect Immun* 76(6):2333-2340.
- 783 55. Sohaskey CD & Wayne LG (2003) Role of narK2X and narGHJI in hypoxic  
784 upregulation of nitrate reduction by Mycobacterium tuberculosis. *J Bacteriol*  
785 185(24):7247-7256.
- 786 56. Wayne LG & Hayes LG (1998) Nitrate reduction as a marker for hypoxic  
787 shiftdown of Mycobacterium tuberculosis. *Tuber Lung Dis* 79(2):127-132.
- 788 57. Akhtar S, Khan A, Sohaskey CD, Jagannath C, & Sarkar D (2013) Nitrite  
789 reductase NirBD is induced and plays an important role during in vitro dormancy  
790 of Mycobacterium tuberculosis. *J Bacteriol* 195(20):4592-4599.
- 791 58. Roncarati D, Danielli A, & Scarlato V (2014) The HrcA repressor is the  
792 thermosensor of the heat-shock regulatory circuit in the human pathogen  
793 Helicobacter pylori. *Mol Microbiol* 92(5):910-920.
- 794 59. Hitomi M, Nishimura H, Tsujimoto Y, Matsui H, & Watanabe K (2003)  
795 Identification of a helix-turn-helix motif of Bacillus thermoglucosidasius HrcA  
796 essential for binding to the CIRCE element and thermostability of the HrcA-  
797 CIRCE complex, indicating a role as a thermosensor. *J Bacteriol* 185(1):381-385.
- 798 60. Houry WA, Frishman D, Eckerskorn C, Lottspeich F, & Hartl FU (1999)  
799 Identification of in vivo substrates of the chaperonin GroEL. *Nature*  
800 402(6758):147-154.
- 801 61. Chaudhuri TK, Farr GW, Fenton WA, Rospert S, & Horwich AL (2001)  
802 GroEL/GroES-mediated folding of a protein too large to be encapsulated. *Cell*  
803 107(2):235-246.
- 804 62. Farr GW, *et al.* (2003) Folding with and without encapsulation by cis- and trans-  
805 only GroEL-GroES complexes. *EMBO J* 22(13):3220-3230.
- 806 63. Sorci L, *et al.* (2009) Targeting NAD biosynthesis in bacterial pathogens:  
807 Structure-based development of inhibitors of nicotinate mononucleotide  
808 adenylyltransferase NadD. *Chem Biol* 16(8):849-861.
- 809 64. Anandan T, *et al.* (2014) Phosphorylation regulates mycobacterial proteasome. *J*  
810 *Microbiol* 52(9):743-754.
- 811 65. Wu Y, *et al.* (2017) Mycobacterium tuberculosis proteasomal ATPase Mpa has a  
812 beta-grasp domain that hinders docking with the proteasome core protease. *Mol*  
813 *Microbiol* 105(2):227-241.
- 814 66. Atlas RM & Snyder JW (1995) *Handbook of media for clinical microbiology* (CRC  
815 Press, Boca Raton) pp v, 313 p.
- 816 67. van Soolingen D, Hermans PW, de Haas PE, Soll DR, & van Embden JD (1991)  
817 Occurrence and stability of insertion sequences in Mycobacterium tuberculosis  
818 complex strains: evaluation of an insertion sequence-dependent DNA  
819 polymorphism as a tool in the epidemiology of tuberculosis. *J Clin Microbiol*  
820 29(11):2578-2586.
- 821 68. Stuehr DJ & Marletta MA (1985) Mammalian nitrate biosynthesis: mouse  
822 macrophages produce nitrite and nitrate in response to Escherichia coli  
823 lipopolysaccharide. *Proc Natl Acad Sci U S A* 82(22):7738-7742.
- 824 69. Festa RA, *et al.* (2011) A novel copper-responsive regulon in Mycobacterium  
825 tuberculosis. *Mol Microbiol* 79(1):133-148.

826 70. Sherwood AR, Paasch BC, Worby CA, & Gentry MS (2013) A malachite green-  
827 based assay to assess glucan phosphatase activity. *Anal Biochem* 435(1):54-56.  
828

829

830 **FIGURE LEGENDS**

831 **Figure 1. The *M. tuberculosis* Pup-proteasome system (PPS) is required for growth**  
832 **in nitrate.**

833 (A) The PPS does not promote survival of *M. tuberculosis* during complete nitrogen  
834 starvation. Survival of *M. tuberculosis* wild type (WT), *mpa* (MHD149), and *prcBA* strains  
835 was measured by number of colony-forming units (CFU) per ml of culture at the indicated  
836 time points. At week three, the fold change in CFU from input was determined to be  
837 statistically insignificant ( $p > 0.05$ ) for *mpa* and *prcBA* strains compared to the WT strain.  
838 Experiment represents data from six replicate cultures. (B) The PPS is not essential for  
839 growth of *M. tuberculosis* in ideal nitrogen sources. Growth of *M. tuberculosis* strains in  
840 Proskauer-Beck (PB) minimal media supplemented with single nitrogen sources  
841 asparagine (PB-Asn) or glutamate (PB-Glu) was measured by optical density at 580 nm  
842 ( $OD_{580}$ ). (C) An intact PPS is essential for *M. tuberculosis* growth when provided nitrate  
843 as the sole nitrogen source. *M. tuberculosis* strains were grown in PB supplemented with  
844 arginine (PB-Arg), nitrate (PB-nitrate), or ammonium (PB-ammonium). (D)  
845 Complementation of the *mpa* mutant growth defect in PB-nitrate. (E) Pupylation and  
846 proteasomal degradation are required for *M. tuberculosis* nitrate utilization, as assessed  
847 by the growth of *pafA* (MHD2), *mpa* (MHD5), and *prcBA* strains in PB-nitrate. (F)  
848 Schematic of the *M. tuberculosis* enzymes that catalyze reduction of nitrate to ammonium  
849 (33, 34). (G) PPS mutants (as in E) secrete excess nitrite into culture supernatants during  
850 growth in PB-nitrate. Experiments in (B) through (E) and (G) each contain data from three  
851 replicate cultures. \*\*\*,  $p < 0.001$ .

852

853 **Figure 2. Disruption of *hrcA* increases chaperonin production and restores nitrite**  
854 **reductase activity to an *mpa* mutant.**

855 (A) The *M. tuberculosis* HrcA regulon, illustrating operons repressed by HrcA. Positions  
856 of HrcA consensus binding sites are shown as gray squares (36). (B) A transposon  
857 mutation in *hrcA* results in the overproduction of chaperonins. Lysates from WT  
858 (MHD1350), *mpa* (MHD1352), *mpa hrcA* (MHD1347), and *mpa hrcA* complemented  
859 (MHD1344) strains were separated by SDS-PAGE, and proteins were stained with  
860 Coomassie brilliant blue. Molecular weight markers are indicated at left. Characteristic  
861 migration pattern of GroEL1 and GroEL2, which are similar in size, is indicated with an  
862 arrowhead. (C) Disruption of *hrcA* partially rescues the growth defect of an *mpa* mutant  
863 in PB-nitrate. (D) Disruption of *hrcA* returns bacterial nitrite secretion to WT levels in an  
864 *mpa* mutant during growth in PB-nitrate. <L.O.D., below the limit of detection. (E) The  
865 chaperonin genes are transcriptionally repressed in an *mpa* mutant (MHD149) compared  
866 to the WT parental strain. (F) The *mpa* mutant contains less soluble protein than WT or  
867 *mpa hrcA* (MHD1297) strains during growth in PB-nitrate. Additionally, the *mpa hrcA*  
868 strain contains less insoluble protein than WT or *mpa* strains. (G) An *mpa* mutant is  
869 defective in nitrite reduction, which is partially rescued by *hrcA* disruption. Nitrite  
870 reductase activity was measured in normalized protein extracts from bacteria grown in  
871 PB-nitrate. Extracts were supplemented with NADH, NAD<sup>+</sup>, and nitrite, and nitrite  
872 reductase activity was assessed by measuring NADH oxidation over time (the nitrite  
873 reductase NirBD catalyzes electron transfer from NADH to nitrite to generate ammonium)  
874 (50). The difference in nitrite reductase activity between *mpa* and *mpa hrcA* lysates was  
875 determined to be statistically significant as indicated. Experiments in (C) through (G) each

876 contain data from three replicate cultures. Statistical significance is indicated as follows:  
877 \*,  $p < 0.05$ ; \*\*,  $p < 0.01$ ; \*\*\*,  $p < 0.001$ . For all panels, "comp" indicated complementation  
878 with *hrcA*.

879

880 **Figure 3. HrcA is a pupylated protein that is likely degraded by the *M. tuberculosis***  
881 **proteasome.**

882 (A) Purified HrcA can be pupylated on any of its lysines by PafA. His<sub>6</sub>-Pup<sub>GLU</sub> and PafA-  
883 His<sub>6</sub> were co-incubated with HrcA<sub>TAP</sub> WT or lysine-to-arginine (K>R) variants, and both  
884 native and pupylated HrcA were detected by immunoblotting (IB) using an antibody that  
885 recognizes an affinity tag on HrcA<sub>TAP</sub> (FLAG). Data are representative of three  
886 independent experiments. (B) GroEL2 abundance is low in both *mpa* (MHD149) and  
887 *prcBA* strains compared to the WT parental strain. Immunoblots for GroEL2 and  
888 dihydrolipoamide acyltransferase (DlaT) were performed on the same membrane using  
889 samples obtained from replicate PB-nitrate cultures. For each lane, GroEL2 was  
890 normalized to DlaT, a protein that is not regulated by the PPS. The difference in  
891 normalized GroEL2 abundance between strains is indicated at the bottom; for comparison  
892 of WT and *mpa* strains, this difference had a  $p$ -value of 0.07; the difference in GroEL2  
893 abundance between WT and *prcBA* strains had a  $p$ -value of  $< 0.01$ .

894

895 **Figure 4. Point mutations in *nadD* restore nitrate growth to an *mpa* mutant and**  
896 **increase NAD abundance in bacteria.**

897 (A) Amino acid substitutions in NadD partially rescue growth of an *mpa* mutant in PB-  
898 nitrate. Strains WT, MHD149, MHD1294, MHD1300, MHD1301, and MHD1311 are

899 represented. Note that strains MHD1294, MHD1300, MHD1301, and MHD1311 each  
900 have transposon insertions in unrelated genes (see *SI Appendix*, Table S1 for full  
901 genotypes). (B) *nadD* mutations restore nitrite secretion by the *mpa* strain to WT levels  
902 during growth in PB-nitrate. (C) Ectopic expression of WT *nadD* or *nadD*<sub>V62A</sub> partially  
903 rescues growth of an *mpa* mutant in PB-nitrate (left) and lowers nitrite secretion by the  
904 *mpa* mutant (right). Strains MHD1350, MHD1352, MHD1440, and MHD1456 are  
905 represented. (D) An *mpa* mutant contains less NAD than a WT strain, a defect that is  
906 rescued both by mutations in *nadD* and by disruption of *hrcA* (MHD1297). Total NAD  
907 [oxidized (NADH) and reduced (NAD<sup>+</sup>) forms] was quantified in lysates of bacteria grown  
908 in PB-nitrate; statistical significance is indicated by comparison to the *mpa* single mutant.  
909 Experiments in (A) through (D) each contain data from three replicate cultures. \*\*,  $p <$   
910 0.01; \*\*\*,  $p <$  0.001.

911

912 **Figure 5. Abundance of pupylated proteins depends on the nitrogen source.**

913 (A) *M. tuberculosis* contains a lower abundance of pupylated proteins, and of a model  
914 PPS substrate, when grown in PB-nitrate compared to PB-Asn. Pupylated proteins were  
915 detected by immunoblot (IB) using a monoclonal antibody that recognizes *M. tuberculosis*  
916 Pup. The same immunoblot membranes were used to detect inositol-3-phosphate  
917 synthase (Ino1) and PrcB. The relative pupylome abundance between growth conditions  
918 (bottom) was normalized by PrcB abundance and was statistically significant ( $p <$  0.05).  
919 (B) Pup-Zur-His<sub>6</sub> levels are reduced in WT *M. tuberculosis* grown in PB-nitrate compared  
920 to PB-Asn. The normalized Pup-Zur-His<sub>6</sub> intensity in the second lane relative to the first

921 lane is 0.62. PrcB and Mpa were detected on the same membrane, while PrcA was  
922 detected using a membrane separately prepared with the same lysates.

923

924 **Figure 6. Model of PPS control over *M. tuberculosis* nitrate metabolism.**

925 Left: HrcA, which represses the *M. tuberculosis* chaperonin genes including *groEL2*, is  
926 likely pupylated and degraded by the Mpa/20S CP proteasome to allow for the full  
927 expression of the chaperonins that promote the folding or assembly of the nitrite  
928 reductase NirBD. Middle: Failure of proteasomal degradation in *M. tuberculosis* leads to  
929 the repression of the chaperonin genes, preventing the formation of functional NirBD.  
930 Right: Disruption of *hrcA* restores NirBD activity in an *mpa* mutant through the full de-  
931 repression the chaperonin genes, while gain-of-function mutations in *nadD* increase the  
932 abundance of NAD to promote NirBD catalysis.

933

934

935



**Table 1. Analysis of NadD variants.**

| Protein Sample | T <sub>m</sub> (s.d.) <sup>a</sup> , °C | Activity (s.d.), nmol min <sup>-1</sup> mg <sup>-1</sup> |
|----------------|-----------------------------------------|----------------------------------------------------------|
| NadD WT        | 54.4 (1.06)                             | 1.09 (0.01)                                              |
| NadD V62A      | 48.7 (0.94)                             | 0.48 (0.015)                                             |
| NadD T105I     | 68.0 (1.21)                             | 0.11 (0.05)                                              |
| NadD G131V     | 68.9 (0.82)                             | 1.95 (0.005)                                             |
| NadD G188A     | 67.7 (0.78)                             | 2.34 (0.07)                                              |

<sup>a</sup>T<sub>m</sub>, melting temperature; s.d., standard deviation.

**Figure 1**

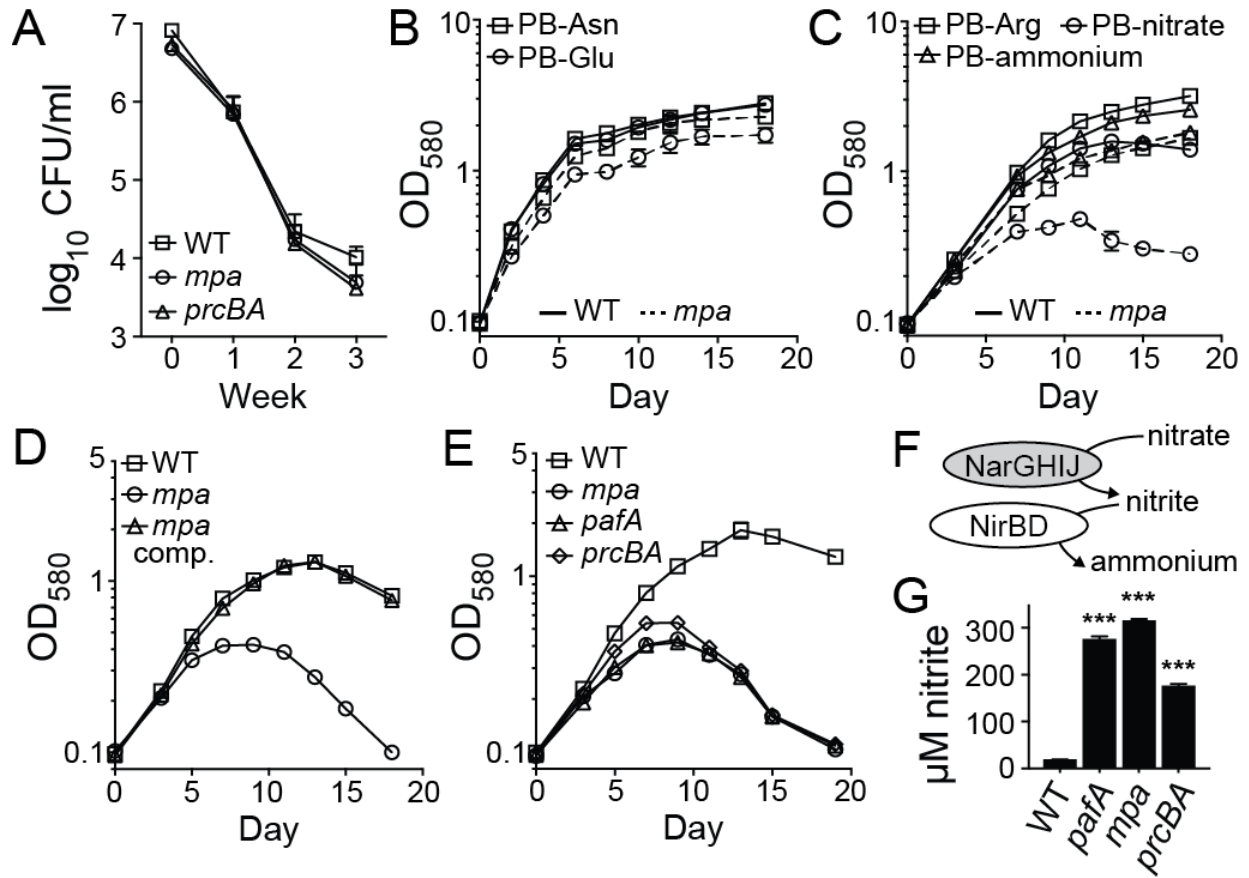

**Figure 2**

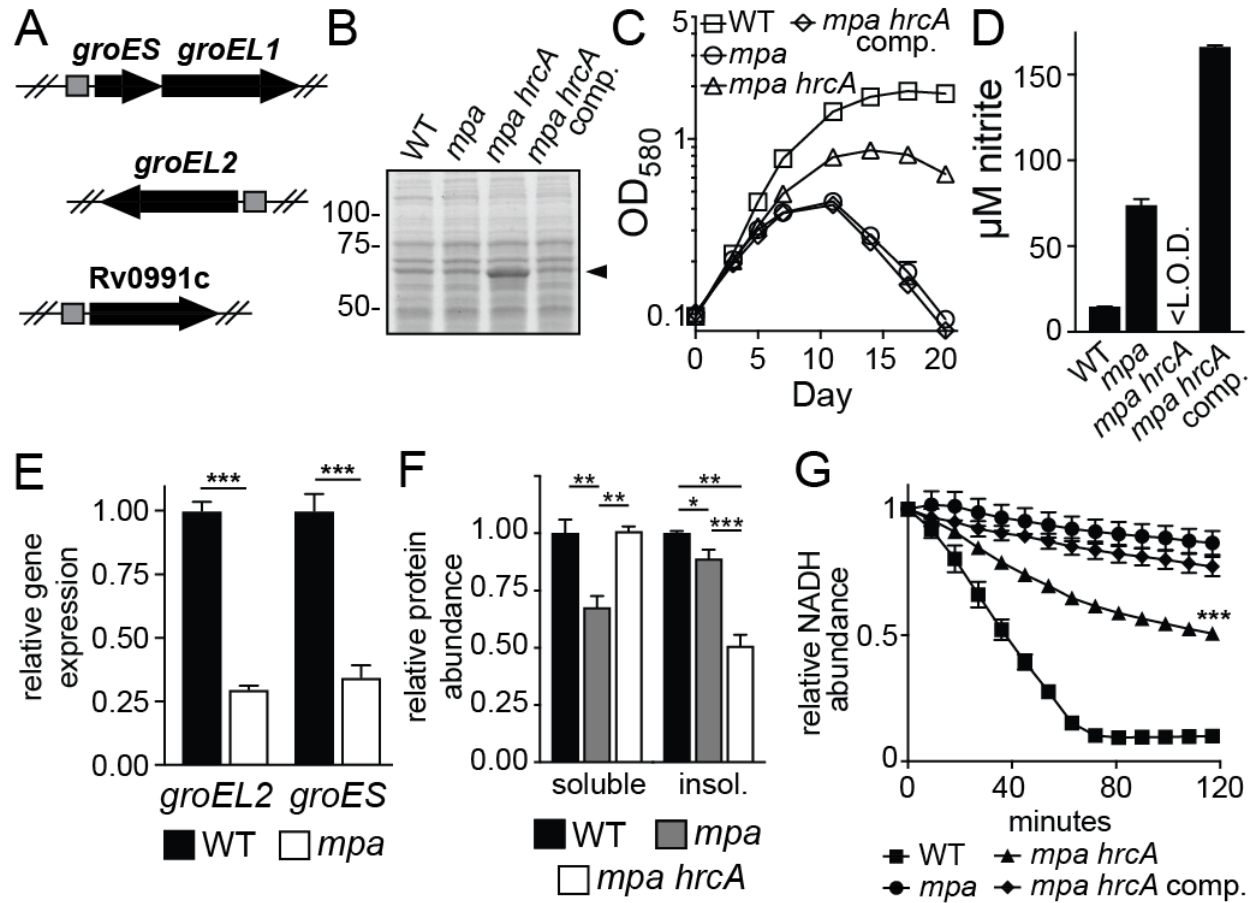

**Figure 3**

**A**

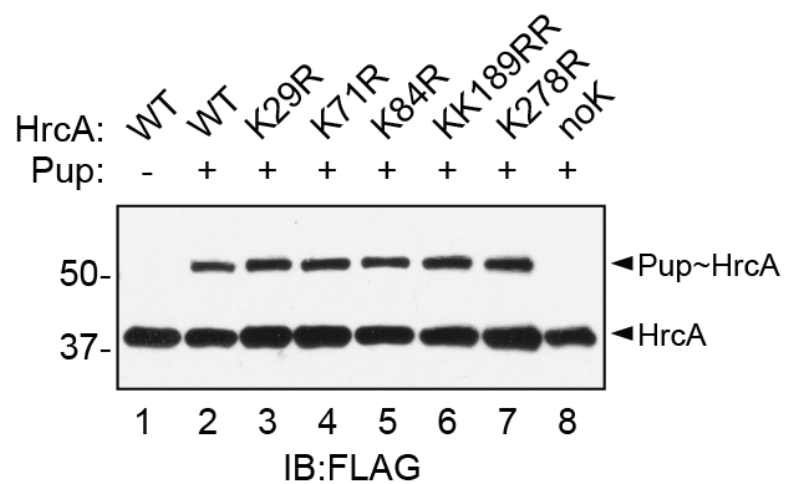

**B**

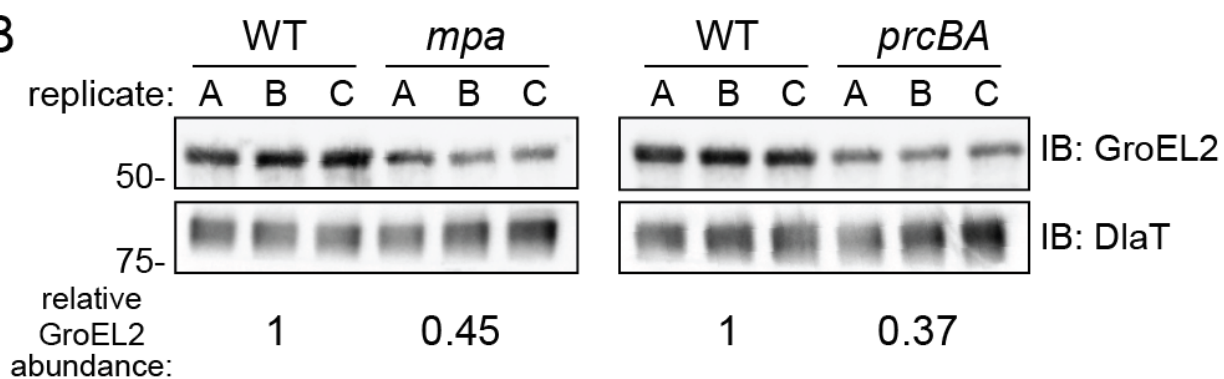

**Figure 4**

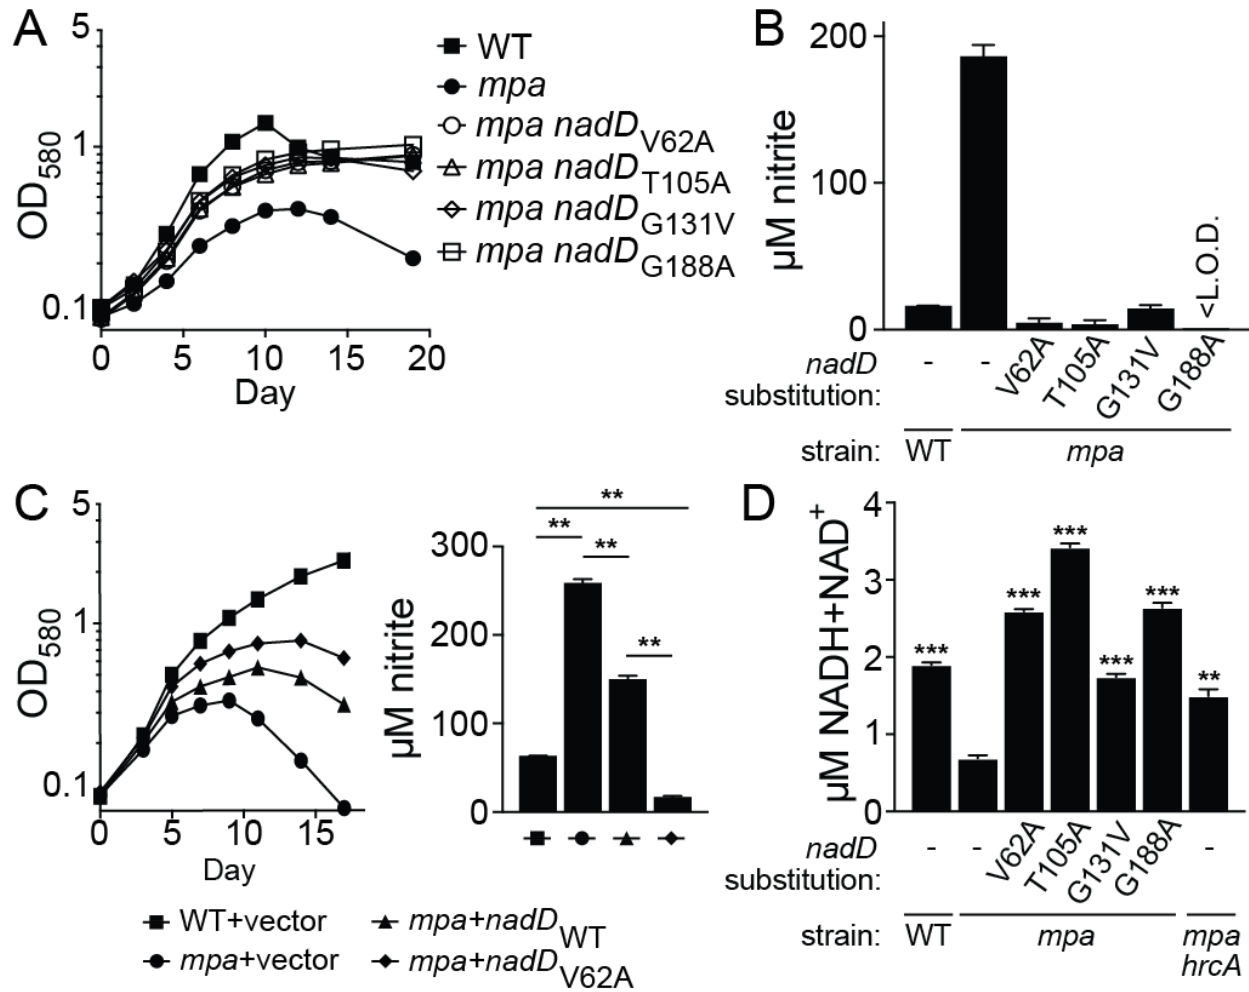

**Figure 5**

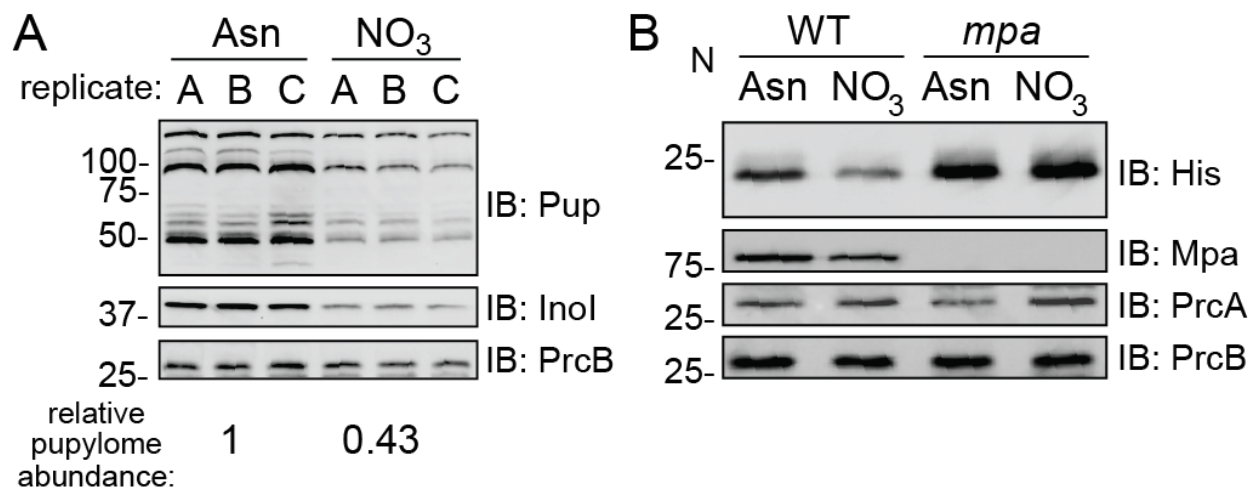

Figure 6

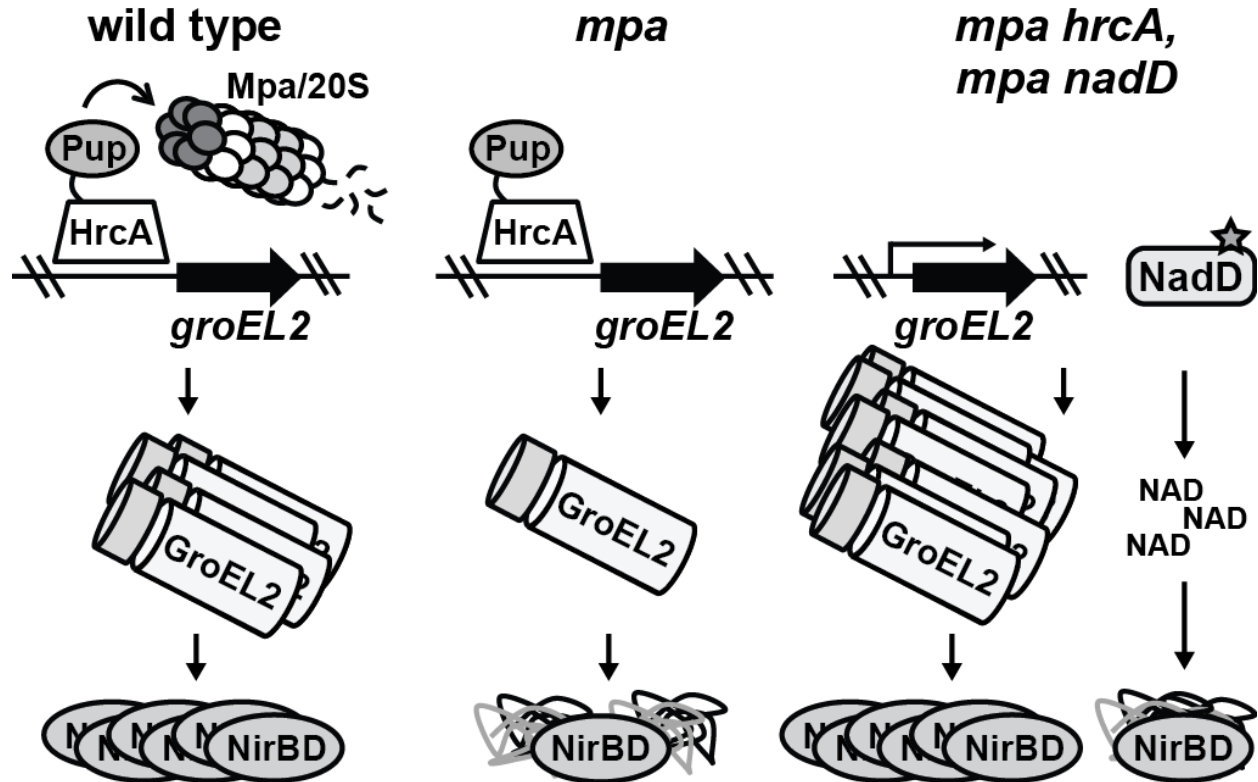

## Supplementary Information for:

### **The *Mycobacterium tuberculosis* Pup-proteasome system regulates nitrate metabolism through an essential protein quality control system**

Samuel H. Becker<sup>1</sup>, Jordan B. Jastrab<sup>1,2</sup>, Avantika Dhabaria<sup>3</sup>, Catherine T. Chaton<sup>4</sup>, Jeffrey S. Rush<sup>4</sup>, Konstantin V. Korotkov<sup>4</sup>, Beatrix Ueberheide<sup>3</sup>, and K. Heran Darwin<sup>1\*</sup>

<sup>1</sup>Department of Microbiology, New York University School of Medicine, 430 E. 29th Street, Suite 312, New York, NY 10016, USA

<sup>2</sup>Current address: Department of Medicine, Brigham and Women's Hospital, Boston, MA 02115, USA

<sup>3</sup>Proteomics Laboratory, Division of Advanced Research Technologies, 430 E. 29<sup>th</sup> Street, Suite 860, New York, NY 10016  
New York University School of Medicine, New York, NY 10016, USA.

<sup>4</sup>Department of Molecular and Cellular Biochemistry, University of Kentucky, 741 S. Limestone Street, Lexington, KY 40536, USA

\*Corresponding author: [heran.darwin@med.nyu.edu](mailto:heran.darwin@med.nyu.edu)

**Classification:** Biological Sciences: Microbiology

**Keywords:** *Mycobacterium tuberculosis*, proteasome, nitrate, chaperonins



**This PDF file includes:**

Table S1

Figures S1 to S3

Legends for Figures S1 to S3

Supplementary Experimental Procedures

References for SI Appendix

**Other supplementary materials for this manuscript include the following:**

Datasets S1 and S2

## SUPPLEMENTARY TABLES AND FIGURES

**TABLE S1.** Strains, plasmids and primers used in this study.

### *M. tuberculosis* strains

| Strain       | Relevant genotype or description                                                                                                   | Source or reference |
|--------------|------------------------------------------------------------------------------------------------------------------------------------|---------------------|
| H37Rv        | Wild type American Type Culture Collection (ATCC) #25618                                                                           | ATCC                |
| MHD5         | Kan <sup>R</sup> ; <i>mpa</i> ::MycoMarT7                                                                                          | (1)                 |
| MHD149       | Hyg <sup>R</sup> ; $\Delta$ <i>mpa</i> :: <i>hyg</i>                                                                               | (2)                 |
| <i>prcBA</i> | Hyg <sup>R</sup> ; $\Delta$ <i>prcBA</i> :: <i>hyg</i>                                                                             | (3)                 |
| MHD18        | Hyg <sup>R</sup> ; H37Rv, pMV306                                                                                                   | (1)                 |
| MHD22        | Hyg <sup>R</sup> , Kan <sup>R</sup> ; MHD5, with pMV306                                                                            | (1)                 |
| MHD23        | Hyg <sup>R</sup> , Kan <sup>R</sup> ; MHD5, with pMV306- <i>mpa</i>                                                                | (1)                 |
| MHD2         | Kan <sup>R</sup> ; <i>paflA</i> ::MycoMarT7                                                                                        | (1)                 |
| MHD1294      | Kan <sup>R</sup> ,Hyg <sup>R</sup> ; <i>eccA1</i> ::MycoMarT7, <i>nadD</i> codon 131 C>A (Gly131Val substitution)                  | This study          |
| MHD1296      | Kan <sup>R</sup> ,Hyg <sup>R</sup> ; Rv3256c::MycoMarT7, <i>hrcA</i> codon 56 T>C (Tyr56His substitution)                          | This study          |
| MHD1297      | Kan <sup>R</sup> ,Hyg <sup>R</sup> ; <i>hrcA</i> ::MycoMarT7 inserted at codon 57                                                  | This study          |
| MHD1298      | Kan <sup>R</sup> ,Hyg <sup>R</sup> ; <i>ppsB</i> ::MycoMarT7, frameshift mutation at <i>hrcA</i> codon 317                         | This study          |
| MHD1299      | Kan <sup>R</sup> ,Hyg <sup>R</sup> ; Rv0796::MycoMarT7, frameshift mutation at <i>hrcA</i> codon 138                               | This study          |
| MHD1300      | Kan <sup>R</sup> ,Hyg <sup>R</sup> ; <i>mazE3</i> ::MycoMarT7, <i>nadD</i> codon 188 C>G (Gly188Ala substitution)                  | This study          |
| MHD1301      | Kan <sup>R</sup> ,Hyg <sup>R</sup> ; Rv3637::MycoMarT7, <i>nadD</i> codon 62 A>G (Val62Ala substitution)                           | This study          |
| MHD1302      | Kan <sup>R</sup> ,Hyg <sup>R</sup> ; PPE19::MycoMarT7, <i>nadD</i> codon 62 A>G (Val62Ala substitution)                            | This study          |
| MHD1303      | Kan <sup>R</sup> ,Hyg <sup>R</sup> ; <i>cobI</i> ::MycoMarT7, duplication of <i>hrcA</i> codon 264 encoding a valine insertion     | This study          |
| MHD1304      | Kan <sup>R</sup> ,Hyg <sup>R</sup> ; <i>cyp136</i> ::MycoMarT7 inserted at codon 383                                               | This study          |
| MHD1305      | Kan <sup>R</sup> ,Hyg <sup>R</sup> ; <i>hrcA</i> ::MycoMarT7 inserted at codon 335                                                 | This study          |
| MHD1306      | Kan <sup>R</sup> ,Hyg <sup>R</sup> ; Rv0496::MycoMarT7, <i>nadD</i> codon 62 A>G (Val62Ala substitution)                           | This study          |
| MHD1307      | Kan <sup>R</sup> ,Hyg <sup>R</sup> ; <i>lppR</i> ::MycoMarT7 inserted at codon 206                                                 | This study          |
| MHD1308      | Kan <sup>R</sup> ,Hyg <sup>R</sup> ; <i>nadD<sub>P</sub></i> ::MycoMarT7 inserted 14 bases upstream of the <i>nadD</i> start codon | This study          |
| MHD1309      | Kan <sup>R</sup> ,Hyg <sup>R</sup> ; <i>cinA</i> ::MycoMarT7, <i>hrcA</i> codon 32 G>A (Val32Met substitution)                     | This study          |
| MHD1311      | Kan <sup>R</sup> ,Hyg <sup>R</sup> ; <i>virS</i> ::MycoMarT7, <i>nadD</i> codon 105 G>A (Thr105Ile substitution)                   | This study          |
| MHD1350      | Gm <sup>R</sup> ; MHD1, with pTT1B                                                                                                 | This study          |
| MHD1352      | Gm <sup>R</sup> , Hyg <sup>R</sup> ; MHD149, with pTT1B                                                                            | This study          |

|         |                                                                                          |            |
|---------|------------------------------------------------------------------------------------------|------------|
| MHD1347 | Gm <sup>R</sup> , Hyg <sup>R</sup> , Kan <sup>R</sup> ; MHD1297, with pTT1B              | This study |
| MHD1344 | Gm <sup>R</sup> , Hyg <sup>R</sup> , Kan <sup>R</sup> ; MHD1297, with pTT1B- <i>hrcA</i> | This study |
| MHD15   | Kan <sup>R</sup> ; <i>groEL1::MycoMarT7</i>                                              | (1)        |
| MHD1384 | Hyg <sup>R</sup> ; ΔRv0991c:: <i>hyg</i>                                                 | This study |
| MHD1383 | Hyg <sup>R</sup> ; Δ <i>hrcA</i> :: <i>hyg</i>                                           | This study |
| MHD1433 | Gm <sup>R</sup> , Hyg <sup>R</sup> ; MHD1383, with pTT1B                                 | This study |
| MHD1434 | Gm <sup>R</sup> , Hyg <sup>R</sup> ; MHD1383, with pTT1B- <i>hrcA</i>                    | This study |
| MHD1456 | Gm <sup>R</sup> , Hyg <sup>R</sup> ; MHD149, with pTT1B- <i>nadD</i>                     | This study |
| MHD1440 | Gm <sup>R</sup> , Hyg <sup>R</sup> ; MHD149, with pTT1B- <i>nadD</i> <sub>V62A</sub>     | This study |
| MHD382  | Hyg <sup>R</sup> ; MHD1, with pSYMP- <i>pup-zur-his6</i>                                 | (4)        |
| MHD384  | Hyg <sup>R</sup> , Kan <sup>R</sup> ; MHD5, with pSYMP- <i>pup-zur-his6</i>              | (4)        |

### ***E. coli* strains**

| Strain        | Relevant genotype or description                                                                                                       | Source or reference |
|---------------|----------------------------------------------------------------------------------------------------------------------------------------|---------------------|
| DH5a          | <i>supE44 ΔlacU169 (φ80 lacΔM15) hsdR17 recA1 endA1 gyrA96 thi-1 relA1 (Nal<sup>R</sup>)</i>                                           | Gibco               |
| ER2566        | F- λ- <i>fhuA2 [lon] ompT lacZ::T7 genel gal sulA11 Δ(mcrC-mrr)114::IS10 R(mcr-73::miniTn10)2 R(zgb-210::Tn10)1 (tetS) endA1 [dcm]</i> | (5)                 |
| Rosetta (DE3) | F <sup>-</sup> <i>ompT hsdS<sub>B</sub>(r<sub>B</sub><sup>-</sup> m<sub>B</sub><sup>-</sup>) gal dcm (DE3) pRARE (Cam<sup>R</sup>)</i> | EMD Millipore       |
| S17-λpir      | <i>tpR strR recA thi pro hsdR RP4::2-Tc::Mu::Km Tn7 λpir lysogen</i>                                                                   | (6)                 |

### **Plasmids**

| Plasmid                                            | Description                                                                                               | Reference  |
|----------------------------------------------------|-----------------------------------------------------------------------------------------------------------|------------|
| pODC29- <i>nadD</i> - <i>his6</i>                  | Amp <sup>R</sup> ; for purification of recombinant NadD with N-terminal His <sub>6</sub> tag              | (7)        |
| pODC29- <i>nadD</i> <sub>V62A</sub> - <i>his6</i>  | Amp <sup>R</sup> ; for purification of recombinant NadD <sub>V62A</sub> with N-terminal His <sub>6</sub>  | This study |
| pODC29- <i>nadD</i> <sub>T105I</sub> - <i>his6</i> | Amp <sup>R</sup> ; for purification of recombinant NadD <sub>T105I</sub> with N-terminal His <sub>6</sub> | This study |
| pODC29- <i>nadD</i> <sub>G131V</sub> - <i>his6</i> | Amp <sup>R</sup> ; for purification of recombinant NadD <sub>G131V</sub> with N-terminal His <sub>6</sub> | This study |
| pODC29- <i>nadD</i> <sub>G188A</sub> - <i>his6</i> | Amp <sup>R</sup> ; for purification of recombinant NadD <sub>G188A</sub> with N-terminal His <sub>6</sub> | This study |
| pET24b(+)                                          | Kan <sup>R</sup> ; for inducible production of recombinant protein in <i>E. coli</i>                      | Novagen    |
| pET24b(+)- <i>hrcA</i> - <i>his6</i>               | Kan <sup>R</sup> ; intermediate plasmid for construction of pET24b(+)- <i>hrcA</i> -TAP                   | This study |
| pET24b(+)- <i>hrcA</i> -TAP                        | Kan <sup>R</sup> ; for purification of recombinant HrcA with C-terminal FLAG-His <sub>6</sub>             | This study |

|                                                |                                                                                                                      |            |
|------------------------------------------------|----------------------------------------------------------------------------------------------------------------------|------------|
| pET24b(+)- <i>hrcA</i> <sub>K29R</sub> -TAP    | Kan <sup>R</sup> ; for purification of recombinant HrcA <sub>K29R</sub> with C-terminal FLAG-His <sub>6</sub>        | This study |
| pET24b(+)- <i>hrcA</i> <sub>K71R</sub> -TAP    | Kan <sup>R</sup> ; for purification of recombinant HrcA <sub>K71R</sub> with C-terminal FLAG-His <sub>6</sub>        | This study |
| pET24b(+)- <i>hrcA</i> <sub>K84R</sub> -TAP    | Kan <sup>R</sup> ; for purification of recombinant HrcA <sub>K84R</sub> with C-terminal FLAG-His <sub>6</sub>        | This study |
| pET24b(+)- <i>hrcA</i> <sub>KK189RR</sub> -TAP | Kan <sup>R</sup> ; for purification of recombinant HrcA <sub>KK189RR</sub> with C-terminal FLAG-His <sub>6</sub>     | This study |
| pET24b(+)- <i>hrcA</i> <sub>K278R</sub> -TAP   | Kan <sup>R</sup> ; for purification of recombinant HrcA <sub>K278R</sub> with C-terminal FLAG-His <sub>6</sub>       | This study |
| pET24b(+)- <i>hrcA</i> <sub>noK</sub> -TAP     | Kan <sup>R</sup> ; for purification of recombinant HrcA lacking native lysines with C-terminal FLAG-His <sub>6</sub> | This study |
| pET24b(+)- <i>prcA</i> -his <sub>6</sub>       | Kan <sup>R</sup> ; for purification of recombinant PrcA with C-terminal His <sub>6</sub>                             | This study |
| pET24b(+)- <i>Msm-prcB</i> -his <sub>6</sub>   | Kan <sup>R</sup> ; for purification of recombinant PrcB with C-terminal His <sub>6</sub>                             | This study |
| pYUB854                                        | Hyg <sup>R</sup> ; for generation of <i>M. tuberculosis</i> mutants through allelic exchange                         | (8)        |
| pYUB854- <i>hrcA</i> -KO2                      | Hyg <sup>R</sup> ; for generation of a deletion-disruption <i>hrcA</i> mutation in MHD1383                           | This study |
| pYUB854-Rv0991c-KO                             | Hyg <sup>R</sup> ; for generation of a deletion-disruption Rv0991c mutation in MHD1384                               | This study |
| pMV306                                         | Hyg <sup>R</sup> ; for integration into the L5 <i>attB</i> site of the <i>M. tuberculosis</i> chromosome             | (9)        |
| pMV306- <i>mpa</i>                             | Hyg <sup>R</sup> ; <i>mpa</i> complementation plasmid                                                                | (1)        |
| pTT1B                                          | Gm <sup>R</sup> ; for integration into the Tweety <i>attP</i> site of the <i>M. tuberculosis</i> chromosome          | (10)       |
| pTT1B- <i>hrcA</i>                             | Gm <sup>R</sup> ; <i>hrcA</i> complementation plasmid                                                                | This study |
| pTT1B- <i>nadD</i> <sub>WT</sub>               | Gm <sup>R</sup> ; <i>nadD</i> complementation plasmid                                                                | This study |
| pTT1B- <i>nadD</i> <sub>V62A</sub>             | Gm <sup>R</sup> ; <i>nadD</i> <sub>V62A</sub> allele plasmid                                                         | This study |
| pSYMP- <i>pup-zur</i> -his <sub>6</sub>        | Hyg <sup>R</sup> ; for production of Pup-Zur-His <sub>6</sub> in <i>M. tuberculosis</i>                              | (4)        |

## Primers

| Primer name                  | Primer sequence                                      |
|------------------------------|------------------------------------------------------|
| NdeI- <i>hrcA</i> -F         | gatcCATATGggaagcgccgacgagcg                          |
| EcoRI- <i>hrcA</i> -R-nostop | ttaaGAATTCGGtcgagcaccaggacgtcgc                      |
| <i>hrcA</i> -K29R-F          | CAACCCAGGAACCGATCGGCTCCAGATCCCTGGTGAACGCCATAACCTG    |
| <i>hrcA</i> -K29R-R          | CAGGTTATGGCGTTCCACCAGGGATCTGGAGCCGATCGGTTCTTG GGTG   |
| <i>hrcA</i> -K71R-F          | CGGACGCGTGCCACGGAGAGGGGCTACCGCGAGTTCGTCGAC           |
| <i>hrcA</i> -K71R-R          | GTCGACGAACCTCGCGGTAGCCCCTCTCCGTGGGCACGCGTCCG         |
| <i>hrcA</i> -K84R-F          | ttcgtcgaccggctcgaggacgtcAGAcccctatcgtcggccgagcgccgg  |
| <i>hrcA</i> -K84R-R          | ccggcgctcggccgacgataggggTCTgacgtcctcgagccggctcgacgaa |

|                            |                                                       |
|----------------------------|-------------------------------------------------------|
| hrcA-KK189RR-F             | atactcggccaggcgctggaaggcAGAAGActtccagcgcttcggtggcggtc |
| hrcA-KK189RR-R             | gaccgccaccgaagccgctgaaagTCTTCTgccttcagcgctggccgagtat  |
| hrcA-K278R-F               | CGGCTCAGCAGGAAGCCGGCAGGGTGACGGTTCGCATAGGTCAT<br>GAGAC |
| hrcA-K278R-R               | GTCTCATGACCTATGCGAACCGTCACCCTGCCGGCTTCCTGCTGA<br>GCCG |
| Stul-hrcAup-F              | ttaaAGGCCTtcggttgcaacaagggcagctcg                     |
| Xbal-hrcAup-R              | ttaaTCTAGAcacgactgctcacctcacttcttac                   |
| HindIII-hrcA-down-<br>F2   | TTAAAAGCTTCGGCTGCTGGCGGCTCAGCA                        |
| BglII-hrcA-down-R          | ttaaAGATCTcccgggcccgcacctcg                           |
| KpnI-Rv0991c-up-<br>F2     | ttaaGGTACCgcgtagtactctgggctgacatcggtcacacgataac       |
| Xbal-Rv0991c-up-<br>R2     | ttaaTCTAGAcacaagaacctccggaatgtcactcggcgtagcactct      |
| HindIII-Rv0991c-<br>down-F | TTAAAAGCTTTGAGTTGAGAGGTTATCCACAAGGGG                  |
| BglII-Rv0991c-<br>down-R   | TTAAAGATCTGCCGGGATCATGCTCGTGCC                        |
| EcoRI-FLAG-NotI-<br>F      | gcgcGAATTCGgattacaaggatgacgacgataagGCCGCCGCat         |
| EcoRI-FLAG-NotI-<br>R      | atatGCCGCCGCcttatcgctcatccttgaatcCGAATTCggcg          |
| NdeI-prcA-F                | ggttCATATGagtttccgtatttcatctcgctgagca                 |
| HindIII-prcA-ns-R          | ggccAAGCTTgcccgcgattcggcgtcaga                        |
| NcoI-nadD-F                | tataCCATGGGCAtgcatgggctgattgggagtca                   |
| PstI-nadD-R                | tataCTGCAGTCATAGGCCATTCCCAGCGGCCAG                    |
| Xbal-hrcA-p-f              | ttaaTCTAGAttgccttcccgcacctttg                         |
| EcoRI-hrcA-R               | ttaaGAATTCTCATCGAGCACCCAGGACGTC                       |
| Xbal-nadD-p-F              | ggccTCTAGAaccagtcccggcccgtcgg                         |
| EcoRI-nadD-R               | ggccGAATTCcataggccattcccagcggcca                      |
| NdeIsmprcBF                | GATCATATGacctggcgcgataatcagtcctttc                    |
| H3smprcBR                  | GAT-AAGCTTcgaatctcctcgcatcaatgc                       |

FIGURE S1

A

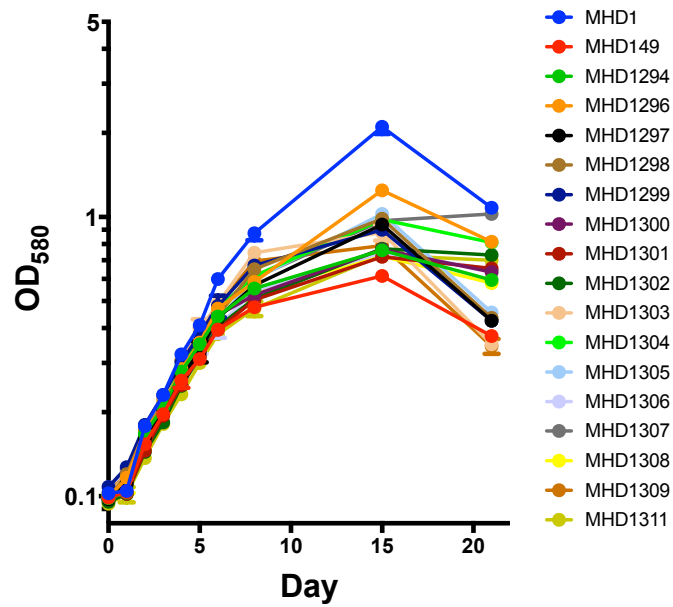

B

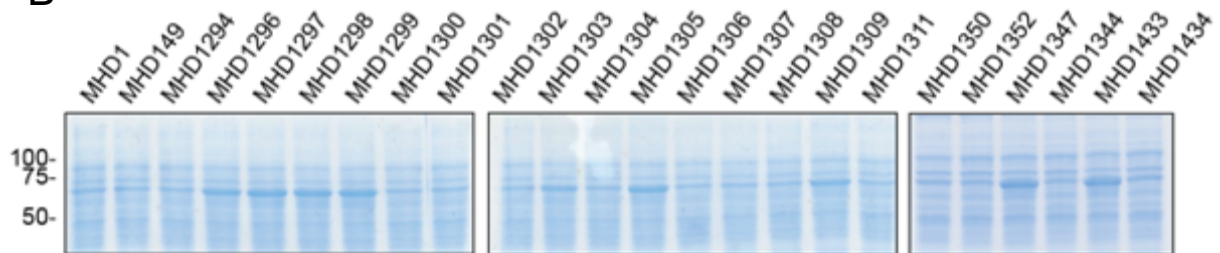

FIGURE S2

A

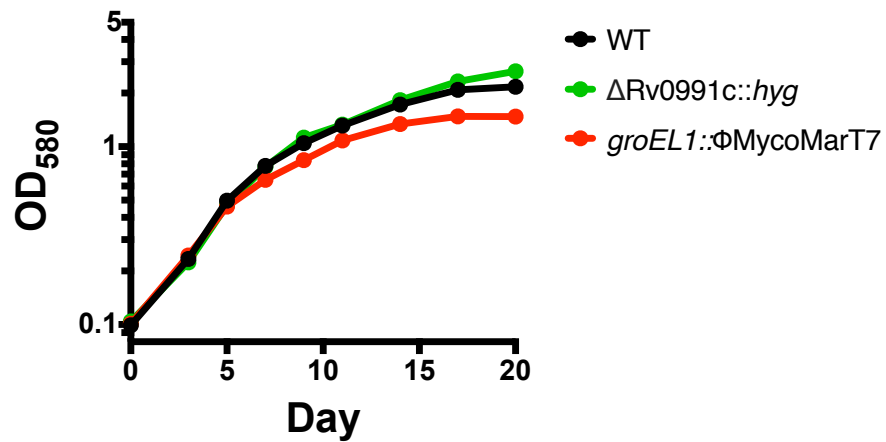

B

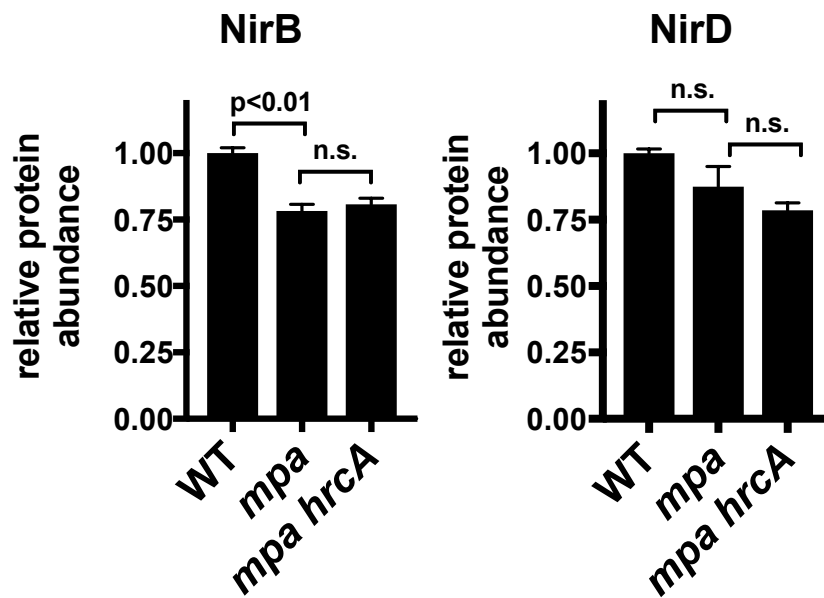

FIGURE S3

A

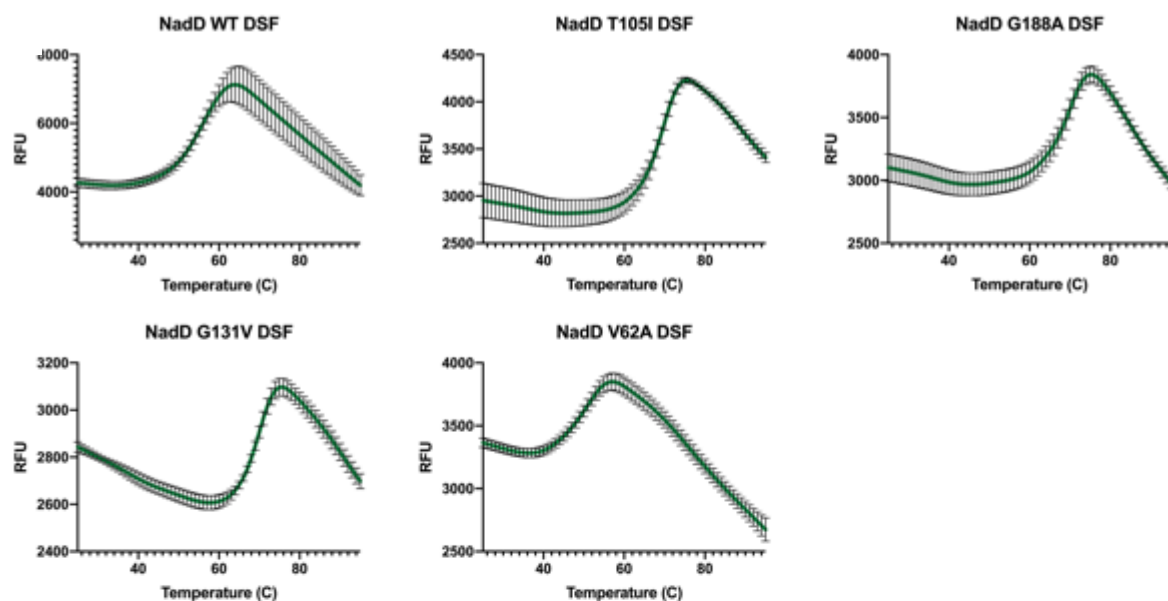

B

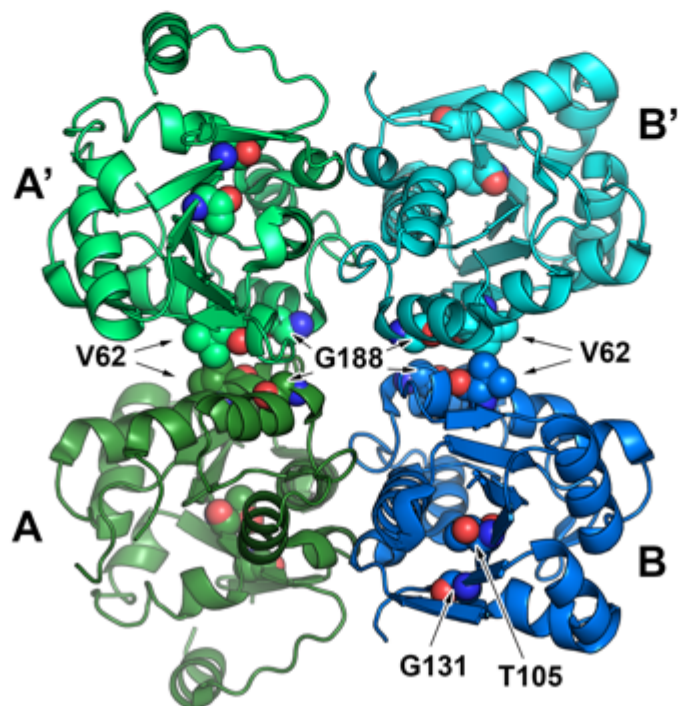



## SUPPLEMENTARY FIGURE LEGENDS

**Figure S1.** (A) Growth of indicated strains (see Table S1) in PB-nitrate. (B) Assessment of GroEL1/GroEL2 levels in suppressor mutants. Lysates were prepared from indicated strains (see Table S1) grown in 7H9; proteins were separated by SDS-PAGE and stained with Coomassie brilliant blue.

**Figure S2.** (A) Strains with mutations in Rv0991c (MHD1384) or *groEL1* (MHD15) grow in PB-nitrate. (B) NirB is less abundant in *mpa* (MHD149) and *mpa hrcA* (MHD1297) strains compared to WT, and NirD abundance follows a similar trend although the difference did not reach statistical significance. Data in (B) are adapted from Dataset S1.

**Figure S3.** (A) Stability of purified WT NadD along with indicated NadD variants. Stability was determined by measuring protein melting temperature ( $T_m$ ) using a thermal shift assay (see Experimental Procedures in the main text).  $T_m$  values are summarized in Table 1. (B) Location of NadD mutations in the structure of *M. tuberculosis* NadD. A tetrameric structure of NadD (PDB: 4X0E) (7) is shown in cartoon representation. Mutated residues are shown as spheres. Chains A and B (which are present in the asymmetric unit) form a tetramer with the crystallographic symmetry chains A' and B'.

## SUPPLEMENTARY EXPERIMENTAL PROCEDURES

**Primers and plasmid construction.** Table S1 contains a list of all primers and plasmids used in this study. Primers used for PCR amplification were purchased from Life Technologies. DNA was PCR-amplified using polymerases Phusion (New England Biolabs; NEB), Pfu (Agilent), or Taq (Qiagen) according to the manufacturers' instructions. Plasmids encoding single- or double- lysine-to-arginine HrcA<sub>TAP</sub> variants were constructed using overlap extension PCR (11). Amplified DNA was purified using the QIAquick Gel Extraction Kit (Qiagen). Restriction enzymes and T4 DNA ligase used for cloning were purchased from NEB, and cloning was performed in *E. coli* strain DH5 $\alpha$ . Plasmids were purified from *E. coli* using the QIAprep Spin Miniprep Kit, and DNA was sequenced by GENEWIZ, Inc. to ensure the veracity of the cloned sequence. To generate pET24b(+)-*hrcA*-TAP by inserting the FLAG sequence directly upstream of His<sub>6</sub>, primers EcoRI-FLAG-NotI-F and EcoRI-FLAG-NotI-R were annealed and cloned into pET24b(+)-*hrcA*-his<sub>6</sub>. To construct pET24b(+)-*hrcA*<sub>noK</sub>-TAP, a plasmid harboring an *hrcA* allele with mutations in all six native lysine codons (*hrcA*<sub>noK</sub>) was constructed using gene synthesis (GENEWIZ, Inc.); *hrcA*<sub>noK</sub> was subcloned into pET24b(+)-*hrcA*-TAP. To generate mutant variants of NadD, *nadD* mutant alleles were PCR-amplified from respective *M. tuberculosis* strains and cloned into the previously described construct for *M. tuberculosis* NadD expression in *E. coli* (7) (Table S1).

Deletion-disruption mutations in *hrcA* and Rv0991c (strains MHD1383 and MHD1384, respectively) were generated using allelic exchange plasmids to replace the respective genes with a hygromycin resistance cassette, as described in detail previously

(8). For allelic exchange using pYUB854-*hrcA*-KO2, the last 77 codons of *hrcA* were maintained in order to preserve the promoter of the downstream gene, *dnaJ2* (Rv2373c). Successful allelic exchange in mutant strains was confirmed by PCR-amplifying and sequencing the deletion-disruption site from the chromosome.

Plasmids were transformed into *M. tuberculosis* by electroporation as previously described (12). Single-colony transformants were isolated on 7H11 with antibiotic selection.

**Purification of recombinant NadD.** To obtain NadD WT and mutant variants, Rosetta (DE3) *E. coli* competent cells were transformed with the relevant plasmids and grown to an OD<sub>600</sub> of 1.5-1.7 at 37 °C with shaking. 400 μM Isopropyl β-D-thiogalactopyranoside (IPTG) was added and the cells were allowed to express for 4.5 hours at 37 °C. Because all four mutants displayed some level of cytotoxicity, the cells were grown to a higher density and allowed to express for a shorter time than is typical to minimize cell death while still providing acceptable protein yields. Pellets were obtained by centrifugation and cells were lysed with ThermoFisher's bacterial protein extraction reagent (B-PER), lysozyme, and DNase at 25 °C for 1 hour. Protein was purified from filtered lysate by passage over a Ni-affinity column containing HisPur Superflow agarose (Thermo Fisher Scientific). Under these conditions, NadD co-purifies in a complex with NAD phosphate (NADP<sup>+</sup>). After washing with 20 mM Tris-HCl at pH 7.5, 300 mM sodium chloride, 10 mM imidazole, NADP<sup>+</sup> was dissociated from NadD by three successive washes with buffer containing 20 mM Mg-ATP. Each wash was allowed a 20 min incubation. Mg-ATP was then removed by passage of three buffer washes with 15 min incubations before final

elution using 20 mM Tris-HCl at pH 7.5, 300 mM sodium chloride, 250 mM imidazole. After overnight dialysis at 4°C to remove the imidazole, the protein was then further purified on a Superdex 200 10/300 Increase (GE Healthcare). The collected protein was then concentrated to 1 mg/ml using an Amicon Ultra-50 10 kD cutoff centrifugal filter unit before being flash frozen in liquid nitrogen.

**Detailed immunoblotting procedures.** Antibodies used in this study: FLAG M2 monoclonal antibody (Sigma-Aldrich) was used according to the manufacturer's instructions; for Pup-Zur-His<sub>6</sub> we used PentaHis Antibody (Qiagen); for GroEL2 immunoblots we used the NR-13655 monoclonal antibody to *M. tuberculosis* GroEL2 (BEI Resources) at a concentration of 1:1000 in 3% BSA; for Pup, we used an *M. tuberculosis* Pup-specific monoclonal antibody (13) at 1:1000 in 3% BSA; for DlaT immunoblots, DlaT antiserum (14) was used at 1:5,000 in 3% BSA; polyclonal rabbit antisera to Ino1 (15), Mpa (16), PrcB and PrcA were used at a 1:1000 dilution in 3% BSA. Secondary antibodies HRP-conjugated goat anti-rabbit IgG F(ab')<sub>2</sub> and HRP-conjugated anti-mouse IgG(H+L) were purchased from Thermo Fisher Scientific. All primary and secondary antibodies were made or diluted in 25 mM Tris-Cl/125 mM NaCl/0.05% Tween 20 buffer (TBST). Immunoblots were developed using SuperSignal West Pico PLUS chemiluminescent substrate (Thermo Fisher Scientific) and imaged using a Bio-Rad ChemiDoc system.

**Detailed mass spectrometry procedures.** Following preparation of lysates from *M. tuberculosis* as described in the main text, 150 µg of each protein lysate were reduced using dithiothreitol (5 µl of 0.2 M) for 1 h at 55 °C. The reduced cysteines were

subsequently alkylated with iodoacetamide (5  $\mu$ l of 0.5 M) for 45 min in the dark at room temperature. Next, 20 mM HEPES (pH 8.0) was added to dilute the urea concentration to 2 M. Protein lysates were digested with Trypsin (Promega) at a 100:1 (protein:enzyme) ratio overnight at room temperature. The pH of the digested protein lysates was lowered to pH < 3 using trifluoroacetic acid (TFA). The digested lysates were desalted using C18 solid-phase extraction (Sep-Pak, Waters). 40% acetonitrile (ACN) in 0.5% acetic acid followed by 80% ACN in 0.5% acetic acid was used to elute the desalted peptides. The peptide eluate was concentrated in a SpeedVac and stored at  $-80^{\circ}\text{C}$ .

For tandem-mass-tag (TMT) labeling, the dried peptide mixture was re-suspended in 100 mM TEAB (pH 8.5) using a volume of 100  $\mu$ l, and each sample was labeled with TMT reagent according to the manufacturer's protocol (Thermo Fisher Scientific). In brief, each TMT reagent vial (0.8 mg) was dissolved in 41  $\mu$ l of anhydrous ethanol and was added to each sample. The reaction was allowed to proceed for 60 min at room temperature and then quenched using 8  $\mu$ l of 5% weight/volume hydroxylamine. The samples were combined at a 1:1 ratio and the pooled sample was subsequently desalted using SCX and SAX solid-phase extraction columns (Strata, Phenomenex) as described (17).

A 500  $\mu$ g aliquot of pooled sample was fractionated using basic pH reverse-phase HPLC as previously described (18). Briefly, the sample was loaded onto a 4.6 mm  $\times$  250 mm Xbridge C18 column (Waters, 3.5  $\mu$ m bead size) using an Agilent 1260 Infinity Bio-inert HPLC and separated over a 70 min linear gradient from 10 to 50% Buffer B in Buffer A at a flow rate of 0.5 ml/min (Buffer A = 10 mM ammonium formate, pH 10.0; Buffer B = 90% ACN, 10 mM ammonium formate, pH 10.0). A total of 40 fractions were

collected throughout the gradient. The early, middle and late eluting fractions were concatenated and combined into 10 final fractions. The combined fractions were concentrated in the SpeedVac and stored at  $-80^{\circ}\text{C}$  until further analysis.

For analysis by liquid chromatography with tandem mass spectrometry (LC-MS/MS), an aliquot of each sample was loaded onto a trap column (Acclaim® PepMap 100 pre-column,  $75\ \mu\text{m} \times 2\ \text{cm}$ , C18,  $3\ \mu\text{m}$ ,  $100\ \text{\AA}$ , Thermo Scientific) connected to an analytical column (EASY-Spray column,  $50\ \text{m} \times 75\ \mu\text{m}$  ID, PepMap RSLC C18,  $2\ \mu\text{m}$ ,  $100\ \text{\AA}$ , Thermo Scientific) using the autosampler of an Easy nLC 1000 (Thermo Scientific) with solvent A consisting of 2% ACN in 0.5% acetic acid and solvent B consisting of 80% ACN in 0.5% acetic acid. The peptide mixture was gradient eluted into the QExactive mass spectrometer (Thermo Scientific) using the following gradient: a 5%-23% solvent B in 100 min, 23%-34% solvent B in 20 min, 34%-56% solvent B in 10 min, followed by 56%-100% solvent B in 20 min. The full scan was acquired with a resolution of 70,000 (@  $m/z$  200), a target value of  $1\text{e}6$  and a maximum ion time of 120 ms. After each full scan 10 HCD MS/MS scans were acquired using the following parameters: resolution 35,000 (@  $m/z$  200), isolation window of  $1.5\ m/z$ , target value of  $1\text{e}5$ , maximum ion time of 250 ms, normalized collision energy (NCE) of 30, and dynamic exclusion of 30 s.

Raw mass spectrometry data were processed using Proteome Discoverer 2.1. Proteins and peptides were searched against the Mycobacterium tuberculosis H37Rv proteome using the Byonic with a protein score cut-off of 300, using the following settings: oxidized methionine (M), and deamidation (NQ) were selected as variable modifications, and carbamidomethyl (C) as fixed modifications; precursor mass tolerance 10 ppm; fragment mass tolerance 0.02 Da. Proteins identified with less than two unique peptides

were excluded from analysis. Bioinformatics analysis was performed with Perseus and Microsoft Excel. Student's t-test using Benjamini-Hochberg FDR cutoff was then used to identify proteins with differential abundance between bacterial strains.

## REFERENCES FOR SI APPENDIX

1. Darwin KH, Ehrt S, Gutierrez-Ramos JC, Weich N, & Nathan CF (2003) The proteasome of *Mycobacterium tuberculosis* is required for resistance to nitric oxide. *Science* 302(5652):1963-1966.
2. Samanovic MI, *et al.* (2015) Proteasomal control of cytokinin synthesis protects *Mycobacterium tuberculosis* against nitric oxide. *Mol Cell* 57(6):984-994.
3. Gandotra S, Lebron MB, & Ehrt S (2010) The *Mycobacterium tuberculosis* proteasome active site threonine is essential for persistence yet dispensable for replication and resistance to nitric oxide. *PLoS Pathog* 6(8):e1001040.
4. Burns KE, Pearce MJ, & Darwin KH (2010) Prokaryotic ubiquitin-like protein provides a two-part degron to *Mycobacterium* proteasome substrates. *J Bacteriol* 192(11):2933-2935.
5. Chong YH, *et al.* (1994) Bacterial expression, purification of full length and carboxyl terminal fragment of Alzheimer amyloid precursor protein and their proteolytic processing by thrombin. *Life Sci* 54(17):1259-1268.
6. Miller VL & Mekalanos JJ (1988) A novel suicide vector and its use in construction of insertion mutations: osmoregulation of outer membrane proteins and virulence determinants in *Vibrio cholerae* requires *toxR*. *J Bacteriol* 170(6):2575-2583.
7. Rodionova IA, *et al.* (2015) Mycobacterial nicotinate mononucleotide adenylyltransferase: structure, mechanism, and implications for drug discovery. *J Biol Chem* 290(12):7693-7706.
8. Bardarov S, *et al.* (2002) Specialized transduction: an efficient method for generating marked and unmarked targeted gene disruptions in *Mycobacterium tuberculosis*, *M. bovis* BCG and *M. smegmatis*. *Microbiology* 148(Pt 10):3007-3017.
9. Stover CK, *et al.* (1991) New use of BCG for recombinant vaccines. *Nature* 351(6326):456-460.
10. Pham TT, Jacobs-Sera D, Pedulla ML, Hendrix RW, & Hatfull GF (2007) Comparative genomic analysis of mycobacteriophage Tweety: evolutionary insights and construction of compatible site-specific integration vectors for mycobacteria. *Microbiology* 153(Pt 8):2711-2723.
11. Ho SN, Hunt HD, Horton RM, Pullen JK, & Pease LR (1989) Site-directed mutagenesis by overlap extension using the polymerase chain reaction. *Gene* 77(1):51-59.
12. Hatfull GF & Jacobs WR (2000) *Molecular genetics of mycobacteria* (ASM Press, Washington, D.C.) pp xii, 363 p.
13. Cerda-Maira FA, *et al.* (2010) Molecular analysis of the prokaryotic ubiquitin-like protein (Pup) conjugation pathway in *Mycobacterium tuberculosis*. *Mol Microbiol* 77(5):1123-1135.
14. Tian J, *et al.* (2005) *Mycobacterium tuberculosis* appears to lack alpha-ketoglutarate dehydrogenase and encodes pyruvate dehydrogenase in widely separated genes. *Mol Microbiol* 57(3):859-868.
15. Festa RA, *et al.* (2010) Prokaryotic ubiquitin-like protein (Pup) proteome of *Mycobacterium tuberculosis* [corrected]. *PLoS One* 5(1):e8589.



16. Darwin KH, Lin G, Chen Z, Li H, & Nathan CF (2005) Characterization of a Mycobacterium tuberculosis proteasomal ATPase homologue. *Mol Microbiol* 55(2):561-571.
17. Chapman JR, *et al.* (2017) Phosphoproteomics of Fibroblast Growth Factor 1 (FGF1) Signaling in Chondrocytes: Identifying the Signature of Inhibitory Response. *Mol Cell Proteomics* 16(6):1126-1137.
18. Bhardwaj A, Yang Y, Ueberheide B, & Smith S (2017) Whole proteome analysis of human tankyrase knockout cells reveals targets of tankyrase-mediated degradation. *Nat Commun* 8(1):2214.
